# Supplementary material
Source: Research Square preprint supplement (doi:10.21203/rs.3.rs-9228560/v1)
Supplement: Supplementary file 1 [file 1b0c99b7ff430c11dbf7c76f.xlsx]

## Sheet: 地区生产总值(亿元)
province	y2023	y2022	y2021	y2020	y2019	y2018	y2017	y2016	y2015	y2014	y2013	y2012	y2011	y2010	y2009	y2008
山西省	26050.8	25653.2	23087.8	18202.7	17311	16153.1	14679.1	12160.1	12036.1	12307	12171.8	11819.7	11005.1	9004.5	7231.2	7295.8
安徽省	48227.5	45525.1	43102.8	38628.8	37584.8	34377.3	30141.8	26801.2	24142.7	22880.7	20888.2	18613.7	16532.7	13474.6	11063.3	9691.2
江西省	32677.1	31568.1	29838.2	25825.4	24724	23016.9	20497.6	18761.2	17031.1	15858.6	14473.4	12952.8	11717.4	9503.4	7733	7028.7
河南省	60627.7	58807.4	57806.9	54160.6	53739.3	50273.5	44586.5	40167.7	36798.2	34611.2	31621.4	28878.5	26212.2	22568.2	19077.1	17541.9
湖北省	56794.3	53445.4	50093.3	43017.6	45557	42425.5	37624.2	33767.6	30661.6	28805.9	25851.7	22921	20228.3	16489.1	13422.6	11707.8
湖南省	50667.5	47957.9	45751.9	41693.7	39930.7	36629.3	34127.7	31225	28811.7	26309.1	23916.3	21513.7	19176.4	15814.9	12965.9	11466.6
内蒙古自治区	25020.5	23795.7	21584.8	17623.4	17479.4	16252.9	15009.9	13879	13062.7	12377.3	11584.9	10638.9	9610.8	8342.1	7227	6352.4
广西壮族自治区	27501.7	26419.7	25311.5	22250.7	21341.5	19951.7	18071.7	16417.2	15030.2	13856.7	12680.6	11496.6	10472.7	8712	7243.4	6561.9
重庆市	30614.3	28771.8	28092.5	25158.1	23689.6	21866.8	20260.8	18271.1	16305.9	14911.7	13275.8	11797.8	10314.1	8186.5	6744.1	5978.8
四川省	61353.4	57609.4	55131.3	49445.1	47168.6	43539	38517.1	33879.2	30829.1	29357.5	26858.4	24224.9	21313.1	17466.7	14396.2	12941.4
贵州省	21513.7	20579.5	19921.3	18308.3	17251.8	15886.6	14067.3	12133.9	10887.1	9297.5	8079.9	6828.1	5690.5	4583.7	3910.7	3551.3
云南省	30595.8	29301.1	27895.3	25214.5	23902.1	21427.5	18864.6	16773.6	15358.6	14275.1	13027	11266.3	9666.2	7869.9	6690.2	6120.6
西藏自治区	2532.9	2235.4	2145.1	1956.5	1750.3	1583.5	1381	1197.4	1063.6	954.8	840.3	721.1	620.8	521.4	453	405.2
陕西省	33976.5	33035.6	30476.6	26297	26214.5	24354.8	21776.1	19354.6	18188.3	17635.6	16106.3	14311.5	12320.1	9973	8094.9	7256.8
甘肃省	12345.7	11553.6	10608	9323.1	9053.3	8364.7	7642.6	7207.1	6793.4	6629.4	6108.3	5469.1	4880.7	3987.7	3313.8	3112.5
青海省	3849.2	3677.4	3446.3	3080.6	3020.2	2799.9	2517	2310.7	2054.3	1875.1	1736.1	1547.9	1388.3	1160.8	953.3	909.2
宁夏回族自治区	5368.8	5168.1	4666.5	4036.2	3841.5	3580.6	3271.6	2853.3	2644.7	2516.4	2364.9	2162	1959.3	1595.3	1284.8	1153.7
新疆维吾尔自治区	19603.3	18550.5	16791.5	14262.2	14024.9	13110.1	11460.8	9913.9	9545.7	9400.2	8518.4	7499.5	6607.6	5425.4	4289.5	4183.9
辽宁省	31389.8	29739.7	28471	25839	25665.9	24113.5	22105.4	20832	20657.8	20381.5	19534.3	18127.6	16585.3	14105.8	13003.2	12303
吉林省	13942.7	13121.4	13431.1	12499.5	11949.4	11437.4	11083	10603.5	10162.9	10077	9608.6	8831.3	7857.7	6505.9	5515.3	4905.4
黑龙江省	16470.7	16359.2	15292.8	14000.1	13962.5	13205.7	12659.5	12280.9	12023.2	12357.1	12017	11171	10074	8434.7	7315.8	7215.1
北京市	47353.7	45222.4	44350.7	38503.6	37767	35161.4	31325.9	28438.7	26034.1	23577.5	21746	19568.3	17653.3	15420.2	13335.7	12167.6
天津市	17211.8	16588.5	16093.2	14230.8	14097.2	13411.1	12468.2	11487	10889.2	10749.2	10075.2	9193	8240.8	6991.6	5828.6	5278.3
河北省	45660	43198.3	41205.4	36821.5	35623.5	32947	31065.5	28879.7	26744.1	25644.1	24659.1	23437.3	21711.7	18254.1	15540.3	14403.8
上海市	51404.5	48594.5	47059.4	41603.9	40241.2	37769.1	34378.3	30963.9	27821.6	25964.5	23809.4	21774.9	20406.1	18319.6	16181.4	14877.1
江苏省	130924	124564	119853	104567	99836.9	93456.3	86512.9	78261.2	71876	66228.3	60505.2	54658.4	49689.5	42175.2	35074.6	31445.7
浙江省	85619.6	80770	76765.3	67164.5	64632	59311.7	53135.2	48095.8	44222	40744.1	38023.3	34978.5	32353.1	27902.2	23227.5	21607.9
福建省	54801.7	52099.6	49602.6	43682	42479.1	39204.8	34432.2	30199.2	27307.5	25329.4	22851.7	20510.8	18195.2	15236.6	12625.1	11104.2
山东省	94206.4	89519.4	84838	74355.9	72024.3	67864.4	63958.6	59702.6	56159.1	51552.7	48058.1	43584.3	39622	34429.4	29957.2	27460.2
广东省	137905	132547	127577	113709	110468	101876	93004.8	83493.4	75820.8	69593.4	63757.3	58057.6	54009.6	46821.3	40215.7	37351.5
海南省	7590.2	6912.8	6508.9	5640.8	5442.1	5004.2	4552.9	4151	3782.7	3541.2	3201.9	2863.6	2525.1	2073.7	1652.2	1502

## Sheet: 第三产业增加值(亿元)
province	y2023	y2022	y2021	y2020	y2019	y2018	y2017	y2016	y2015	y2014	y2013	y2012	y2011	y2010	y2009	y2008
山西省	12745.5	11650.9	10908.6	9595.9	9082.7	8337.9	7324.6	6322.2	6090.2	5192.5	4789.9	4325	3668.4	3144.5	2696.6	2533.2
安徽省	25997.8	24311.6	22813.5	20157.2	19773	17644.9	14878.3	12793.9	10928.3	9603.1	8481.6	7347.2	6475.6	5478	4762	4183.7
江西省	17125	16268.8	14945	12949.9	12281	11058.4	9217.8	8234.6	6949	5993.1	5270.9	4620.4	4058.9	3272.7	2788.2	2495.4
河南省	32177	30953.9	29609.7	27390	26918.2	24515.5	20411.9	17963.4	15641.3	14040.7	12330.1	10773.2	9329	7672.4	6436.2	5646.7
湖北省	30975.8	28515	26218	22524.7	23350.6	21303.4	18381.4	15834.1	13982.2	12796.4	11121.7	9093.6	7993	6697.6	5669.7	4925.6
湖南省	27410.8	25836.8	24103.7	21875.6	21308.8	19641	17669.5	15367.4	13398	11812.9	10413.3	9019.2	7872.8	6707	5675.4	4834.7
内蒙古自治区	11245.8	10223.9	9583.6	8804.9	8842.2	8166.8	7485.9	6648.7	6162.9	5624.9	5131.9	4632.1	4257	3823.8	3376.1	2894.4
广西壮族自治区	14055.1	13282	12736.5	11537.2	11081.5	10237.8	9055.1	7996	7073.8	6297.7	5680.6	4867.1	4225.1	3607.2	3102.6	2673.7
重庆市	17381.6	16281.8	15490.7	13708.5	13078.2	11645.9	10529.7	9268.8	8030.2	7146.4	6346	5610	4948.7	3912.9	3146.2	2772
四川省	34018.7	31330	29452	26293.4	25158.5	23054.7	19685.4	16528.5	13975.7	12750	11182	9851.3	8444.1	6798.6	5582.6	5035.9
贵州省	11991.8	11356.7	10839.1	9887.2	9134.6	8224.3	7064.2	5803.4	5218.5	4433.6	3909.5	3248.6	2732	2160.2	1804.6	1591
云南省	16383	15313.4	14527.8	13175	12712.3	11661.3	10208.5	8800.7	7787.6	6891.1	6148	5167.5	4458.2	3511.9	3035.1	2642.6
西藏自治区	1455.5	1279	1232.5	1098.2	973.4	872.4	793.2	696.4	628.2	556.4	488.3	419.7	355.4	301.6	262.4	236.9
陕西省	17390.1	16196	15103.7	13308.2	12633.2	11309.4	9921	8752	7923.9	7023.7	6224.9	5384.4	4648.4	3954.8	3325.9	2873.2
甘肃省	6560.4	6072.4	5711.6	5243.1	5079.8	4677	4267.1	3922.9	3554.6	3110.4	2776.1	2384.8	2066.5	1604.7	1422.1	1291.3
青海省	1825.4	1676.1	1699.5	1582	1543.4	1435.3	1300.3	1219.3	1081.9	944.4	850.4	753.5	682.5	584	482.3	455.4
宁夏回族自治区	2611.7	2441.9	2265.3	2093.3	1973.6	1813.1	1615	1432.6	1291.1	1185.8	1094.7	980.5	864.4	710.5	571.4	482.7
新疆维吾尔自治区	9304	8584	8151.5	7482.4	7418.3	6760.9	5812.8	4994.6	4689.9	4164.1	3711.9	2969.5	2466.9	1945.3	1738.6	1545.2
辽宁省	17642.9	16217.5	15344	14259.9	13977.6	13044	11874.2	11125.2	10259.4	9340.8	8356.7	7371.4	6413.2	5455.1	5166.6	4814.2
吉林省	7871	7157.4	7163.4	6609.1	6500.1	6225.1	5992.1	5572.1	5054.5	5001.9	4786.3	4320.6	3820.5	3091.7	2571.5	2253.9
黑龙江省	8723.3	8174.4	7746.6	7100.3	7111.3	6668.6	6174.8	5839.9	5384	4793.7	4274.8	3951.6	3462.2	2996.8	2505.8	2206.3
北京市	40344.8	38150.6	36507.1	32495.5	31839.7	29563.5	26154.6	23643.2	21473.9	18985.3	17417.9	15563.9	13955.5	12064.2	10482.6	9529.5
天津市	10860.8	10222.7	10046.8	9053.8	8894.9	8400.5	7735.2	6950.6	6237.3	5974.9	5513.4	4911.1	4343.4	3600.2	2900.3	2502
河北省	24084.8	22383.3	20725.3	19003.1	18504.2	16704.3	15157.5	13464.9	12124.1	11002.5	10338.9	9603.6	8733.4	7310.6	6254.1	5465.5
上海市	39760.9	37108.1	35538	31139.5	29817.1	27303.5	24741.6	22279.3	19287.5	17199.3	15391.2	13471.5	12110.4	10770.3	9884.2	8552.3
江苏省	68518.6	64256.9	61558.4	54637.6	51258.3	47185.2	43343.6	39180	34551.8	31572	27908.3	24266.2	21549.5	17912.3	14263.8	12406.5
浙江省	49570.6	45711.5	43182.7	38360	35902	32027.7	27954.6	24634.1	21844.1	19436.8	18141.7	16327.1	14546.9	12438.5	10210.5	9022
福建省	28078.8	26552.1	24268.2	21441.6	20305	17978	15927	13370.4	11638.9	10308.5	9301	8354.8	7386.4	6261.4	5387.2	4621.1
山东省	49649.9	47186	44727.1	39983.5	38442.5	35390.2	32200.3	29307.3	26441.4	23301.8	20988.1	18261.3	15927.4	13284.9	10961.3	9672.5
广东省	79670.7	75855.7	72615.1	65219.7	62588.8	56641.1	50856.7	44493.7	38717.3	34624.3	31537.9	28000.1	25295.4	21704.3	18830	16911.3
海南省	4679.9	4213.6	4021.2	3430.2	3267.6	2965.1	2593.7	2322.3	2064.5	1921.5	1727.4	1432.5	1217.2	1023.2	771.8	665.8

## Sheet: 全体居民人均可支配收入(元)
province	y2023	y2022	y2021	y2020	y2019	y2018	y2017	y2016	y2015	y2014	y2013	y2012	y2011	y2010	y2009	y2008
山西省	30924	29178	27426	25214	23828	21990	20420	19049	17854	16538	15120	13592	11959	10149	8911	8333
安徽省	34893	32745	30904	28103	26415	23984	21863	19998	18363	16796	15154	13593	11873	9955	8683	7893
江西省	34242	32419	30610	28017	26262	24080	22031	20110	18437	16734	15100	13567	11870	10217	9094	8208
河南省	29933	28222	26811	24810	23903	21964	20170	18443	17125	15695	14204	12772	11206	9520	8426	7637
湖北省	35146	32914	30829	27881	28319	25815	23757	21787	20026	18283	16472	14809	12941	11069	9496	8643
湖南省	35895	34036	31993	29380	27680	25241	23103	21115	19317	17622	16005	14391	12612	10861	9745	8804
内蒙古自治区	38130	35921	34108	31497	30555	28376	26212	24127	22310	20559	18693	16800	14715	12538	11015	9923
广西壮族自治区	29514	27981	26727	24562	23328	21485	19905	18305	16873	15557	14082	12644	11054	9739	8655	7839
重庆市	37595	35666	33803	30824	28920	26386	24153	22034	20110	18352	16569	14924	13037	10984	9688	8756
四川省	32514	30679	29080	26522	24703	22461	20580	18808	17221	15749	14231	12753	11130	9373	8214	7413
贵州省	27098	25508	23996	21795	20397	18430	16704	15121	13697	12371	11083	9850	8594	7226	6099	5533
云南省	28421	26937	25666	23295	22082	20084	18348	16720	15223	13772	12578	11233	9739	8184	7170	6492
西藏自治区	28983	26675	24950	21744	19501	17286	15457	13639	12254	10730	9740	8568	7510	6628	5807	5249
陕西省	32128	30116	28568	26226	24666	22528	20635	18874	17395	15837	14372	12885	11229	9412	8122	7263
甘肃省	25011	23273	22066	20335	19139	17488	16011	14670	13467	12185	10954	9768	8463	7358	6454	5782
青海省	28587	27000	25919	24037	22618	20757	19001	17302	15813	14374	12948	11470	10024	8659	7553	6808
宁夏回族自治区	31604	29599	27904	25735	24412	22400	20562	18832	17329	15907	14566	13104	11480	9864	8742	7924
新疆维吾尔自治区	28947	27063	26075	23845	23103	21500	19975	18355	16859	15097	13670	12151	10443	9042	7656	7012
辽宁省	37992	36089	35112	32738	31820	29701	27835	26040	24576	22820	20818	18761	16429	13953	12183	11125
吉林省	29797	27975	27770	25751	24563	22798	21368	19967	18684	17520	15998	14395	12621	10798	9671	8921
黑龙江省	29694	28346	27159	24902	24254	22726	21206	19838	18593	17404	15903	14302	12605	10846	9643	8877
北京市	81752	77415	75002	69434	67756	62361	57230	52530	48458	44489	40830	36817	33176	29228	26571	24371
天津市	51271	48976	47449	43854	42404	39506	37022	34074	31291	28832	26359	24030	21714	19266	16967	15444
河北省	32903	30867	29383	27136	25665	23446	21484	19725	18118	16647	15190	13647	12059	10428	9267	8365
上海市	84834	79610	78027	72232	69442	64183	58988	54305	49867	45966	42174	38550	34731	30436	27500	25385
江苏省	52674	49862	47498	43390	41400	38096	35024	32070	29539	27173	24776	22432	19820	17006	14653	13237
浙江省	63830	60302	57541	52397	49899	45840	42046	38529	35537	32658	29775	27020	24195	21159	18528	17073
福建省	45426	43118	40659	37202	35616	32644	30048	27608	25404	23331	21218	19141	16909	14566	12985	11785
山东省	39890	37560	35705	32886	31597	29205	26930	24685	22703	20864	19008	17127	15077	12922	11398	10411
广东省	49327	47065	44993	41029	39014	35810	33003	30296	27859	25685	23421	21268	18916	16579	14728	13605
海南省	33192	30957	30457	27904	26679	24579	22553	20653	18979	17476	15733	14180	12392	10342	9151	8325

## Sheet: 总抚养比(人口抽样调查)(%)
province	y2023	y2022	y2021	y2020	y2019	y2018	y2017	y2016	y2015	y2014	y2013	y2012	y2011	y2010	y2009	y2008
山西省	43.1	42.7	42	36.8	35.8	35	32.6	31.7	32	30.5	31.1	31	31.5	32.5	33.9	35.3
安徽省	49.8	51.1	51.7	49.4	48.4	46.6	47.3	40.9	40.8	39.5	40.8	39.7	39.9	40.9	41.7	44.6
江西省	47.8	49	49.9	46.6	43.6	42.9	45.7	44.6	44	42.8	40.3	42.1	41	41	43	45.1
河南省	54.4	55.8	56.7	49.5	48.5	47.8	46.4	44.6	44.6	42.2	42.2	41.6	41.9	40.9	39	38.3
湖北省	46.6	46.4	45.6	42.2	40.2	38.6	39	37.1	35.9	35.6	33.1	33.1	32.3	32	32.7	33
湖南省	51.2	52.2	52.3	50.6	49.6	47	44.1	43	42.1	41.2	40.5	42.4	39.6	39.6	39.7	37.3
内蒙古自治区	39.5	38.9	38.1	33.3	30.3	30.1	32.3	28.6	29.2	29.7	28.7	27.8	25.9	27.9	29.4	29.9
广西壮族自治区	54.4	54.5	55.1	49.1	47.1	46.8	47.1	45	47.9	45.8	44.4	46.9	46	45	44.1	45.4
重庆市	49	49	49.3	49.3	47.3	45.8	44.2	41.7	40.6	41.6	40.6	41.5	39.8	40.8	42.8	44.9
四川省	49.2	49.6	49.7	48.4	47.4	45.7	42.4	42.2	40.5	43.3	41.5	39	39.3	39	41.7	40.5
贵州省	54.6	54.3	54.5	52.1	51.1	50.6	45.4	46.8	46.9	45.6	45.7	47.3	49.9	49	49.4	51.9
云南省	43.4	43.7	43.9	39.7	38.7	38.2	37.6	38.7	38	38.3	39	37.6	37.5	38	43.1	42.9
西藏自治区	43.9	44.2	44	45.2	47.2	41.3	42.4	40.9	41.4	43	39.7	38	38.7	37.7	36.6	40.1
陕西省	46.3	45.9	45.2	38.2	36.2	34.3	36.5	34.4	34	34.3	33.2	30.4	30.7	32.7	34.6	35.2
甘肃省	47.2	47.4	47.5	42.1	40.1	40.7	38.7	36.8	36	33.9	34.8	34.8	34.7	35.7	37.4	40.5
青海省	43.4	43.9	44	40	39	37.3	38.8	36.9	37.3	34.1	37.1	38.2	36	37.1	38.8	40
宁夏回族自治区	42.3	42.9	43	43.3	43.3	41	36.7	36.9	37.9	36.1	37.6	38.9	35.9	36.9	39.2	41.6
新疆维吾尔自治区	40.1	41.3	42.3	45.5	47.5	42.4	43.2	42.4	40.7	38.9	37.4	37.5	36.2	37.2	38.6	39.1
辽宁省	45.3	43.7	42	37.4	35.4	33.6	32	31.3	30.7	28.9	26	25.5	28.4	28.8	29.1	30.7
吉林省	40.8	39.9	38.7	35.4	33.4	32.7	32.7	30.7	29.7	28.8	27.3	25	27.3	27	26.7	27.2
黑龙江省	38.2	37.1	36.2	33.2	31.2	29.5	28.3	28.2	27.3	26.6	26.5	26.5	24.6	25	26.6	27.9
北京市	38.6	37.3	35.8	29	28	27.8	30.6	29.2	26.2	23	22.7	21.9	21.3	22	25	25
天津市	43.8	42.8	41.2	30.8	28.8	26.9	29.2	28.6	25.7	29	29.3	28.5	25.7	26.7	26.8	29.9
河北省	51.6	52	51.8	49	47	45.3	42.4	41.6	39.7	38.8	36.9	37.1	34.7	34.9	34	33
上海市	41.1	39.7	37.5	36.7	35.7	33	31.9	29.3	28.5	24.7	25	21.2	19.3	20.3	27.6	26.5
江苏省	47.1	47.1	46.5	42.6	40.6	38.9	37.7	37.4	35.6	34.8	34.4	32.7	31.2	32.2	34.6	34.2
浙江省	38.9	38.6	37.8	38.2	37.2	36.4	32.7	32.6	31.9	27.6	26.8	26.7	26.9	27.9	33.2	32.8
福建省	43.8	44	43.8	37.7	36.7	35.5	38.9	39.4	36.2	33.7	33.4	33.9	30.6	35.6	37.2	38.4
山东省	53.2	52.8	52.3	51.4	50.4	49.6	44.1	40	38.9	37.5	36	36.3	35.7	34.7	34.1	33.9
广东省	38.8	39	38.6	33.5	32.5	33.6	32.6	32.3	30.5	32.9	31.5	30.5	31.2	32.2	33	35.2
海南省	42.8	43.4	43.7	41.5	40.5	37.7	38.9	38.9	39.4	36.4	36.8	35.8	36.6	38.6	41.2	43.9

## Sheet: 每十万人口高等学校平均在校生数(人)
province	y2023	y2022	y2021	y2020	y2019	y2018	y2017	y2016	y2015	y2014	y2013	y2012	y2011	y2010	y2009	y2008
山西省	3528	3388	3112	2688	2515	2383	2401	2439	2504	2519	2474	2351	2202	2132	2050	1979
安徽省	3469	3283	3089	2702	2447	2245	2250	2259	2309	2245	2203	2101	2007	1841	1742	1658
江西省	4510	4423	4001	3424	3010	2771	2676	2698	2654	2527	2381	2295	2212	2162	2118	2062
河南省	3801	3652	3424	3223	2913	2653	2455	2352	2293	2203	2114	2012	1901	1839	1774	1648
湖北省	4483	4110	3914	3598	3248	3088	3000	2950	3038	3121	3144	3078	2991	2906	2829	2724
湖南省	3965	3738	3487	3149	2873	2610	2419	2251	2215	2160	2106	2087	2054	2051	2040	1966
内蒙古自治区	2523	2493	2351	2127	2053	1984	1969	1937	2035	2156	2137	2042	1920	1884	1794	1650
广西壮族自治区	3819	3651	3432	3107	2887	2602	2383	2279	2178	2052	1939	1834	1688	1530	1436	1352
重庆市	4012	3838	3605	3438	3258	3081	3084	3059	3071	3017	2894	2734	2522	2413	2317	2192
四川省	3278	3127	2925	2754	2546	2409	2339	2314	2312	2244	2140	2037	1904	1790	1732	1637
贵州省	2641	2608	2593	2654	2453	2254	2129	2005	1819	1690	1535	1392	1254	1109	1043	969
云南省	3184	3097	2871	2648	2401	2166	1999	1889	1819	1731	1662	1566	1520	1391	1298	1174
西藏自治区	1612	1666	1634	1629	1588	1616	1678	1765	1766	1676	1528	1508	1446	1373	1317	1279
陕西省	4624	4409	4279	4132	3812	3562	3582	3540	3628	3652	3612	3525	3378	3208	3045	2880
甘肃省	3376	3215	2999	2627	2396	2258	2217	2189	2194	2219	2193	2145	2041	1882	1806	1687
青海省	1813	1738	1613	1499	1486	1426	1391	1319	1275	1220	1162	1133	1082	1119	1080	1033
宁夏回族自治区	3338	3271	2749	2691	2581	2379	2278	2225	2244	2255	2195	2107	1912	1868	1721	1610
新疆维吾尔自治区	2956	2773	2526	2331	2106	1954	1863	1780	1759	1749	1681	1596	1521	1467	1430	1414
辽宁省	3963	3931	3742	3487	3136	2866	2859	2845	2876	2933	2903	2811	2712	2671	2659	2621
吉林省	5839	4989	4550	3707	3373	3131	3038	3048	3169	3168	3033	2889	2807	2716	2695	2659
黑龙江省	3817	3734	3448	2695	2531	2405	2403	2427	2518	2555	2529	2441	2409	2447	2420	2352
北京市	5584	5397	5313	5393	5320	5268	5300	5028	5218	5429	5469	5534	5613	6196	6410	6750
天津市	5559	5428	5153	4430	4214	4150	4072	4058	4185	4283	4346	4358	4329	4412	4432	4534
河北省	3190	3070	2926	2700	2596	2457	2328	2191	2141	2098	2108	2063	2006	1951	1871	1811
上海市	3936	3756	3691	3722	3582	3517	3498	3327	3330	3348	3421	3481	3556	4300	4393	4371
江苏省	3845	3726	3531	3653	3311	3143	3045	2937	2896	2858	2814	2786	2824	2819	2786	2679
浙江省	2839	2763	2632	2704	2509	2370	2345	2355	2414	2408	2363	2288	2218	2285	2303	2324
福建省	3462	3277	3023	2866	2577	2355	2352	2438	2508	2513	2435	2301	2200	2144	2039	1937
山东省	3909	3663	3429	3154	2855	2588	2519	2620	2516	2421	2304	2238	2191	2202	2153	2071
广东省	3144	3129	2922	3175	2751	2542	2454	2431	2434	2356	2199	2082	1978	2037	1952	1821
海南省	3169	2999	2839	2764	2497	2305	2261	2258	2290	2317	2253	2218	2079	2036	2001	1800

## Sheet: 医疗卫生机构门诊健康检查人数(万人
province	y2023	y2022	y2021	y2020	y2019	y2018	y2017	y2016	y2015	y2014	y2013	y2012	y2011	y2010	y2009	y2008
山西省	1088.33	995.14	1094.2	891.01	866.54	809.59	863.23	803.2	760.6	788.03	2928.01	874.33	856.64	731.67	729.67	727.27
安徽省	2216.21	2140.34	2182.04	1731.15	1659.76	1478.16	1504.86	1390.54	1359.85	1328.15	1333.57	1378.37	1246.45	1025.21	1023.21	1020.81
江西省	1522.43	1463.83	1442.7	1283.9	1401.69	1558.27	1500.99	1283.6	1186.16	1161.26	1134.05	1181.51	1045.94	712.66	710.66	708.26
河南省	3230.64	2920.52	3146.1	2625.73	2774.57	3150.74	2990.13	2635.83	2771.12	2949.24	2807.3	2664.61	2466.31	1683.44	1681.44	1679.04
湖北省	1992.1	2181.72	2604.94	2000.58	1639.88	1714.65	1685.31	1778.29	1735.34	1729.13	1731.37	1732.32	1573.92	1293.4	1291.4	1289
湖南省	2139.4	2199.05	2200.88	1633.8	1583.5	1595.2	1627.67	1652.24	1637.75	1606.12	1601.73	1658.73	1667.64	1203.97	1201.97	1199.57
内蒙古自治区	748.4	670.48	690.59	545.8	559.37	553.25	517.47	531.46	587.21	533.42	529.41	562.33	571.27	588.97	586.97	584.57
广西壮族自治区	1747.78	1845.43	1981.34	1592.18	1508.63	1529.24	1404.95	1402.81	1382.66	1391.03	1334.24	1417.57	1292.74	951.13	949.13	946.73
重庆市	1067.33	985.1	1167.8	1025.35	910.83	819.95	790.06	751.83	736.6	720.25	684.75	758.82	687.34	511.54	509.54	507.14
四川省	3299.25	3237.13	3420.26	3140.33	3135.07	3060.09	3055.34	2823.65	2776.93	2726.47	2738.85	2946.57	2816.2	1895.5	1893.5	1891.1
贵州省	1162.17	1170.3	1182.49	859.99	826.09	856.23	845.61	784.04	916.93	791.88	855.02	933.01	968.33	628.02	626.02	623.62
云南省	1448.77	1421.44	1503.78	1209.3	1131.53	1029.88	1005.27	980.81	982.27	902.09	891	944.47	801.68	684.22	682.22	679.82
西藏自治区	191.09	164.07	195.27	176.68	178.93	177.86	177.61	142.2	120.22	115.37	90.6	72.46	27.88	14.52	12.52	10.12
陕西省	1244.7	1094.62	1331.73	1059.29	1137.69	1029.35	996.39	888.84	828.55	782.89	827.34	798.93	799.3	732.61	730.61	728.21
甘肃省	840.44	736.23	850.76	676.32	741.25	775.33	793.31	935.25	833.26	855.38	887.38	929.5	822.18	547.98	545.98	543.58
青海省	220.78	173.86	209.63	164.18	164.31	163.67	184.04	147.61	161.61	169.15	177.67	154.08	169.19	129.97	127.97	125.57
宁夏回族自治区	331.45	252.04	269.51	234.3	249.56	233.6	197.72	188.98	211.21	224.08	266.38	244.34	211.32	172.23	170.23	167.83
新疆维吾尔自治区	1500.95	1102.29	1287.71	1217.95	1658.58	1181.99	1184.15	1075.1	690.07	593.4	590.51	572.99	495.02	416.25	414.25	411.85
辽宁省	1102.44	1038.47	1130.18	854.76	1010.25	973.31	955.79	933.08	950.05	1050.45	898.33	804.48	695.91	594.19	592.19	589.79
吉林省	624.43	543.95	598.31	418.32	498.63	507.76	456.89	447.64	419.62	417.54	413.37	438.4	378.39	406.99	404.99	402.59
黑龙江省	682.26	650.93	727.14	570.61	646.07	598.49	617.79	575.59	604.27	597.84	592.6	686.74	600.87	544.57	542.57	540.17
北京市	1160.89	905.2	1021.92	779.92	970.35	952.45	832.57	828.54	854.75	594.1	560.03	542.31	702.92	758.58	756.58	754.18
天津市	544	485.32	503.09	363.76	547.86	484.23	549.55	433.25	443.44	389.06	360.82	285.85	251.88	261.4	259.4	257
河北省	2065.18	1692.76	2200.31	1569.9	1567.97	1603.43	1502.58	1483.2	1452.85	1410.28	1500.67	1505.65	1400.61	1229.75	1227.75	1225.35
上海市	1387.68	1243.71	1499.9	934.48	1020.39	1000.91	959.6	880.5	776.4	652.55	676.94	630.25	613.96	591.32	589.32	586.92
江苏省	3807.54	3818.27	4024.04	3326.03	3360.58	3286.7	3059.81	2786.43	2900.22	2730.41	2600.03	2309.33	2264.2	2017.56	2015.56	2013.16
浙江省	3777.55	3639.69	3757.19	2964	3074.48	3043.54	2769.6	8490.95	2462.43	2259.74	2203.07	2072.58	1972.23	1974.44	1972.44	1970.04
福建省	1424.77	1608.84	1532.66	1062.43	1086.77	1075.63	1016.93	921.51	869.86	943.32	939.62	911.23	852.53	752.51	750.51	748.11
山东省	3392.54	3232.42	3385.86	2844.19	3015.88	3210.18	3152.77	2854.59	2818.52	2800.76	2809.78	2884.58	2605.21	2511.57	2509.57	2507.17
广东省	6245.66	6372.11	7410.83	5109.78	5202.81	4872.79	4429.6	4239.74	4062.39	3930.27	3704.85	3657.96	3377.08	3018.35	3016.35	3013.95
海南省	272.63	282.79	319.87	227.83	223.16	208.27	228.19	218.85	164.74	161.91	163.27	148.39	134.45	120.7	118.7	116.3

## Sheet: 体育城镇单位就业人员(万人)
province	y2023	y2022	y2021	y2020	y2019	y2018	y2017	y2016	y2015	y2014	y2013	y2012	y2011	y2010	y2009	y2008
山西省	4.2	4.1	4.4	4.6	4.4	4.7	4.4	4.6	4.6	4.9	4.7	4.5	4.6	4.6	4.6	4.8
安徽省	3.5	3.6	3.5	3.5	3.7	3.3	3.2	3.4	3.2	3.4	3.4	3.6	3.3	3.4	3.3	3.5
江西省	3.3	3.2	3.2	3.3	3	2.9	3.4	4.2	3.8	3	3.3	3.9	2.9	3.2	3.2	3.3
河南省	6.6	6.7	7.3	7.5	6.8	7.1	7.7	7.8	7.8	7.5	8.5	7.1	7.1	7	7.1	7.2
湖北省	5.9	6.1	6.3	6.1	5.9	6.7	7.2	6.5	6.3	5.7	5.6	6.3	5.4	5.1	5.1	4.9
湖南省	5.9	6.1	6.1	6.2	6.2	5.5	5.7	5.7	5.5	5.3	5.1	5	5.2	4.6	4.3	4.4
内蒙古自治区	3	2.9	3.1	3.2	3.2	3.3	3.7	3.5	3.5	3.5	3.5	3.3	3.3	3.3	3.3	3.3
广西壮族自治区	3.5	3.3	3.3	2.9	3.2	3.2	3.3	3.2	3.4	3.4	3.3	3.3	3.3	3.2	3.1	3.1
重庆市	2.6	2.6	2.7	2.7	2.7	2.8	3.2	2.9	2.9	2.6	2.6	2.6	2.6	2.6	2.4	2.4
四川省	7.3	7.3	6.8	6.3	5.5	5.5	6.3	6.1	6.1	6.3	5.9	4.5	4.4	4.4	4.4	4.3
贵州省	2	2.4	2.5	2.4	2.3	2.4	2.4	2.3	2.1	2	1.9	1.6	1.9	1.8	1.9	1.9
云南省	3.4	3.6	3.7	3.8	3.8	3.8	3.7	3.6	3.5	3.4	3.5	3.4	3.4	3.6	3.5	3.2
西藏自治区	0.7	0.6	0.7	0.7	0.6	0.9	0.8	0.7	0.7	0.7	0.7	0.6	0.6	0.6	0.6	0.6
陕西省	5.2	5.4	5.5	5.6	5.7	5.6	5.6	5	5	4.5	4.6	5	4.9	4.6	4.4	4.2
甘肃省	2.7	2.8	3	2.9	2.8	2.7	2.8	2.7	2.5	2.5	2.5	2.6	2.5	2.8	2.5	2.4
青海省	0.9	0.7	0.8	0.8	0.8	0.8	0.9	0.8	0.9	0.9	0.8	0.8	0.7	0.7	0.7	0.7
宁夏回族自治区	0.8	0.9	0.9	1	0.8	0.9	1	1	1.1	0.9	0.8	0.7	0.7	0.8	0.9	0.8
新疆维吾尔自治区	3	2.8	3.2	2.7	2.6	2.7	2.9	3	3	3	3	2.9	3.2	2.7	2.6	2.4
辽宁省	3.9	3.8	4.3	4.4	4.5	4.1	4.7	5	5.1	5.3	5.5	5.1	5.2	5.1	5.4	5
吉林省	3	3	3	3	3.3	3.7	3.7	3.5	3.6	3.5	3.6	3.6	3.7	3.7	3.7	3.7
黑龙江省	2.5	2.3	2.3	2.5	2.8	3.5	3.8	3.9	4	4.1	4.6	4.2	4.1	3.9	3.9	3.8
北京市	19.4	18.6	19.2	17.9	18.6	19	19	18.7	18.3	17.4	18.1	17.1	16.5	15.3	15.8	14.9
天津市	1.4	1.4	1.7	1.7	2.1	2.3	2.5	2.1	2.2	2.1	2.3	1.9	1.6	1.8	1.8	1.8
河北省	5.2	5.2	5.3	5.2	5.2	5.1	5	5.5	5.5	5.3	5.3	5.2	5.1	5	4.7	4.7
上海市	5.6	5.6	6	6	7.5	5.9	6.4	6	5.6	5.7	5.9	5.1	5.2	4.7	4.6	4.4
江苏省	9	8.7	8.9	8.9	9.2	7.9	8	7.9	7.8	7.8	7.7	6.1	6	5.7	5.6	5.4
浙江省	7.2	6.9	7.4	7.9	8	7.1	6.7	6.8	7.4	7.2	7.2	6.7	6.6	6.2	5.9	5.2
福建省	3.7	3.8	4	4.2	4.2	4.3	4.3	4.2	4.3	4	4	3.6	3.8	3.7	3.7	3.8
山东省	8	7.9	8	7.5	6.9	7.1	7.1	7	7	7.1	7.2	6.9	6.6	6.7	6.4	6
广东省	12.1	12.5	13.1	12.5	13.4	10.5	11.5	11.8	11.6	11.5	10.9	9.5	9.2	9.4	9	8.9
海南省	1.7	1.6	1.6	1.6	1.3	1.4	1.3	1.3	1.2	1.2	1.3	1.1	1.2	1.2	1.4	1.2

## Sheet: 体育城镇单位就业人员平均工资(元)
province	y2023	y2022	y2021	y2020	y2019	y2018	y2017	y2016	y2015	y2014	y2013	y2012	y2011	y2010	y2009	y2008
山西省	73147	68311	64032	60412	58952	57050	53992	49041	47387	40133	36348	33307	29377	24927	23631	21277
安徽省	97730	95935	84665	79224	72342	68973	62014	55773	52272	44211	42787	39138	34353	28435	24416	22793
江西省	92763	92340	85383	80903	80511	72367	64370	61272	53649	44941	44087	43512	32519	30555	27576	23794
河南省	78775	76286	75458	74843	73108	67815	58161	51908	47591	42426	36555	35925	31249	28511	25973	23075
湖北省	108294	101902	96538	88357	83183	79295	69129	61018	58510	51861	45201	37397	35310	32390	27091	23082
湖南省	116331	110748	111988	100019	98085	89668	76383	69158	62665	53924	48902	43448	38532	32908	30758	26441
内蒙古自治区	96222	96377	84989	81138	78895	71777	69346	65311	60979	54827	52312	49701	44326	37805	32545	27861
广西壮族自治区	90062	85575	85338	77581	78402	77963	70016	62365	56579	46735	40389	36314	31609	32141	31565	28627
重庆市	106083	99017	93912	86261	82344	79351	69873	65146	61544	59598	53723	46882	43786	34163	30383	27752
四川省	105808	96973	92287	84292	86139	80152	71769	64885	58860	51728	47138	43665	36944	32101	28291	25859
贵州省	87443	80512	86242	85191	86338	87154	75629	67427	57257	48944	43319	35937	29999	24531	24332	24699
云南省	99493	97467	95112	91621	85090	83405	76032	63017	56135	46209	41914	35997	32058	24834	22377	20164
西藏自治区	147543	145081	129745	108769	113757	108799	112333	117844	114097	67735	62046	57178	55133	50858	48258	47352
陕西省	82433	77824	72929	68473	65406	60860	57597	55946	52918	47853	46364	38995	33425	29724	27119	21079
甘肃省	89269	81669	75521	71080	68623	69608	63705	58837	55246	46981	39989	35478	28503	28769	26946	22676
青海省	97365	92425	88784	85283	78602	80991	78577	67319	59077	55759	49730	45084	42506	38694	36700	31526
宁夏回族自治区	95864	91916	92203	90726	82955	77093	67913	66563	62941	54120	48919	47805	42154	34118	32279	29963
新疆维吾尔自治区	107619	102708	98245	89779	84009	79840	80821	71168	64906	52299	50951	45049	38062	32609	28027	25554
辽宁省	87979	85967	83719	87366	68134	65567	55137	52202	49918	46833	46818	43515	40272	36478	34781	29565
吉林省	80903	74285	72104	67641	65789	63352	57349	55335	50810	40313	37367	34017	30467	26684	25159	21842
黑龙江省	77725	77318	71787	64342	63598	62263	58391	55056	50931	43083	39644	36117	32918	29827	28140	25543
北京市	236493	227639	224007	221193	205405	173632	150810	139087	130134	121094	112707	105785	92617	76415	67881	65056
天津市	133261	138773	134871	143036	165288	131631	116655	111368	87264	77689	67310	64602	59627	54182	49221	43146
河北省	85770	86806	78373	77217	71743	66123	58934	51507	45994	39789	36423	33453	30311	26208	24762	21340
上海市	206752	191524	180734	174370	161284	165573	145257	129644	117099	96303	90056	83701	81409	68533	62422	55888
江苏省	127246	123565	123618	117081	108370	107119	91968	84242	77468	71787	63059	58582	52576	48360	44856	40249
浙江省	150143	144068	138718	125984	116297	114343	109932	97257	87177	78311	73090	66915	61695	56313	49956	47433
福建省	112808	106939	96891	93079	84160	82559	73532	67018	61039	57796	53391	47017	41715	35654	31419	29704
山东省	111057	108177	100855	96490	87556	84445	81074	77462	71453	62056	56870	48702	43492	41008	37964	36088
广东省	136749	127404	132893	133576	130164	116940	104446	93300	80069	69745	65268	56081	53259	47213	44252	40962
海南省	98467	95715	86885	80492	79343	75795	67235	63699	56348	47717	43622	35410	34700	29492	25196	24469

## Sheet: 体育法人单位数(个
province	y2023	y2022	y2021	y2020	y2019	y2018	y2017	y2016	y2015	y2014	y2013	y2012	y2011	y2010	y2009	y2008
山西省	17146	20674	20439	17997	15417	13635	12183	10128	7360	6073	5601	3398	2727	2579	2393	2218
安徽省	26274	27812	25514	23232	21037	21353	18125	14519	13372	11029	8852	3204	2653	2280	2094	1919
江西省	14955	23553	17659	14443	11180	10752	9369	7479	6586	6084	5098	2899	2357	2303	2117	1942
河南省	53490	41117	42011	36426	33538	34229	18163	15552	17609	15757	13048	4574	3856	3750	3564	3389
湖北省	36790	32443	29435	26551	24354	23539	16360	13358	12279	11787	10128	5913	4806	4486	4300	4125
湖南省	35741	39562	31077	27782	23584	24155	19582	16344	14899	14328	14474	4998	4346	4199	4013	3838
内蒙古自治区	7517	10954	10279	8950	8314	7343	5531	4575	3722	3357	3104	1900	1837	1801	1615	1440
广西壮族自治区	13933	17474	15897	14253	12679	11599	9168	8818	7962	7302	6665	3489	3180	3005	2819	2644
重庆市	25020	20373	19118	17272	16681	16975	13588	11155	9173	6896	5682	3156	2394	2128	1942	1767
四川省	41552	46780	26974	26918	25914	26469	17780	17190	15893	15232	12806	6505	4576	4394	4208	4033
贵州省	10190	13522	11518	10059	9162	9258	8782	5829	4616	3476	2853	1765	1515	1480	1294	1119
云南省	16404	17295	18353	18086	14523	14315	12425	9216	7768	6212	5432	3393	2809	2561	2375	2200
西藏自治区	1712	1021	1014	1011	984	1013	513	515	512	485	363	173	172	169	-17	-192
陕西省	18937	20461	15777	15199	13420	13799	8848	7690	7052	6322	5611	3231	2794	2554	2368	2193
甘肃省	7710	8264	7131	6365	5553	5870	5959	5495	4818	3774	3331	1775	1283	1226	1040	865
青海省	2134	2639	2418	2107	1865	1766	1992	1301	1183	1056	888	457	404	394	208	33
宁夏回族自治区	2309	3094	2919	2472	2085	1647	1606	1520	1268	1149	1087	368	333	329	143	-32
新疆维吾尔自治区	6299	7619	6691	6584	5593	5684	7664	4977	3900	3628	2925	1224	1161	1141	955	780
辽宁省	20375	16319	15183	14359	11952	12712	11215	10218	9416	8745	7967	4880	3867	3782	3596	3421
吉林省	8079	5864	5086	4278	3922	4205	3516	3378	3186	3142	2736	1844	1599	1572	1386	1211
黑龙江省	9173	9861	7737	7565	6322	6496	6301	4920	4464	4133	3988	2026	1856	1793	1607	1432
北京市	73865	111767	100015	82571	49183	53882	29908	29447	30574	27309	26787	12754	12112	11762	11576	11401
天津市	10782	11193	10486	9625	7684	7395	10716	7533	4821	3179	2544	1863	1608	1428	1242	1067
河北省	31425	36844	29902	27088	24147	23852	16678	10845	8614	7901	7388	2675	2322	2272	2086	1911
上海市	25145	14793	13791	13669	12802	12599	8172	7621	7315	6864	6266	4941	4453	4166	3980	3805
江苏省	57616	57846	55633	47539	44902	44141	37550	28933	20741	18371	15410	9065	7352	6312	6126	5951
浙江省	52566	63849	57839	52742	42742	36470	30861	25203	21070	17680	14697	7218	6044	5274	5088	4913
福建省	35012	42593	37098	30424	25113	19022	16348	12883	11493	9927	7234	5082	4622	3829	3643	3468
山东省	51247	58476	55878	50216	43350	37583	27862	21732	15590	13593	11541	6234	5263	4992	4806	4631
广东省	98635	71134	68046	66685	63415	61695	25782	20781	18220	16988	14695	9290	7762	7010	6824	6649
海南省	5191	6611	5903	4337	3807	3140	2426	2027	1798	1605	1343	832	712	662	476	301

## Sheet: 文化娱乐类居民消费价格指数
province	y2023	y2022	y2021	y2020	y2019	y2018	y2017	y2016	y2015	y2014	y2013	y2012	y2011	y2010	y2009	y2008
山西省	101.9	100.9	104.2	99.6	101.7	100.5	101.2	100.6	101.6	99.7	101.6	101.4	101.7	101.5	101.7	101.3
安徽省	102	100.6	100.8	99.8	101.3	101.1	102.3	101.2	101.1	101	100.8	101.1	100.6	100.8	101.5	100.9
江西省	103.9	100.8	103.2	100	102.1	101.3	100.9	99.8	101.5	101.4	100.4	101.2	100.7	101.4	102.9	100.3
河南省	101.7	100.3	101.3	100.7	101.1	100.6	101.7	99.8	101.4	102.3	105.1	102	101.4	100.3	103	101.2
湖北省	102.8	103.5	104.1	99.7	101	100.7	100.5	100.2	101	100.4	100.6	101	101.3	101.6	104	101.6
湖南省	103.9	100	101	98.8	101.1	101	102.2	101.2	101	100.8	100.8	100.9	100.9	101.1	104	100.7
内蒙古自治区	101.4	102.4	100.1	100.2	101.9	101.1	101.1	100	100.7	100	101.1	101.7	101.4	100.6	101.4	99.6
广西壮族自治区	100.3	101.3	103.7	99.2	100.2	101.4	101.7	101.4	100.9	101	101.5	103.7	97.8	101.5	104.6	102.2
重庆市	100.9	101.2	101.4	101.4	99.7	102.7	104.9	97.9	101.6	101	101.9	101	100.3	101.6	102.3	101.5
四川省	103.8	101	99.8	100.8	98.6	100.5	104.9	103.2	102.6	100.8	101.7	101.6	100.5	100.8	102.4	101.5
贵州省	99.8	101.6	102.2	100.1	98.5	105.4	100.2	100.7	101	101.4	102.9	101.5	99.7	100.3	102.8	108.2
云南省	104.6	101.6	101.8	101.2	100.3	102.4	100	99.1	102.1	101.4	100.3	100.4	101	101.6	102.5	103.5
西藏自治区	100.9	100.6	100.7	102.4	100.2	100.6	101.8	101.6	100.1	100.3	100.8	101.2	101.1	101.1	102.7	100.8
陕西省	101.7	101.7	101.5	99.6	101.9	101.5	100.6	98.9	101.6	102.8	102.3	102	102.2	100.4	103.1	100.6
甘肃省	101.4	101.2	100.8	100	99.8	100.1	101.6	99.6	100.9	101	100.1	102.6	104.2	100.9	101.8	100.9
青海省	101.2	103.3	102.5	100	100	105.1	98.9	97.4	102.1	101.1	99.9	99	100.9	110.7	103.9	102.7
宁夏回族自治区	102	100.9	99.6	98.7	97.7	100.2	102.5	100.3	102.8	101.2	103	101	102.6	101.9	103	101.5
新疆维吾尔自治区	101	100.7	99.4	100.8	100.5	101.1	101.9	102.1	101.3	102.6	103.7	101.2	100.6	100.9	101.3	100.8
辽宁省	101.6	101.6	101.1	100.6	101.6	99.8	100.5	99.2	101	101.1	101.3	100.9	101	100.4	103.3	101.3
吉林省	101.9	101.8	101.3	101.9	102.8	102.2	101.9	100.1	100.7	100.3	100.4	100.8	100.8	101.1	103.4	101.4
黑龙江省	102.3	101.5	99.9	101.9	100.1	101.1	99.1	100.7	100.2	99.8	98.8	100	101.7	102	102.5	101.5
北京市	104.8	100.3	100.9	103.7	99.7	101.5	102	96.5	101.8	101.9	102.7	102.8	101.6	99.7	103.2	100.6
天津市	104.1	101.4	103.9	100.4	104	102.8	104	100.4	102.4	100.4	101.1	102	100.6	100.5	102	99.3
河北省	101.6	100.9	101	99.5	101.1	101.7	100.4	99.9	101.8	101.8	101	101.1	101.8	100.3	101.7	101.3
上海市	105	102.6	103.1	100.1	99.4	100.7	98.6	101.6	100.7	101	100.3	101.8	102.8	101	104.2	100.7
江苏省	102.3	101.9	102	99.4	102.6	102.9	101.2	100	102.6	102.5	101.8	101	101	102.5	103.1	102.3
浙江省	104.6	101.8	102.9	99.1	102.6	101.1	102.6	100.8	101.5	100.6	101.9	101.6	102.4	101.3	101.1	100.9
福建省	101.8	100.8	100.6	100.1	100.7	101.1	101.6	100.7	101.3	100.8	100.6	101	101	100.6	103	100.9
山东省	103.3	100.3	101.7	99.7	102.4	101.4	101.5	101.5	102.4	101	101.2	100.5	100.4	100.4	101.4	100.4
广东省	104.2	101.7	100.5	99	100.1	101.2	100.9	99.6	103.2	101.4	101	100.6	100.9	100.3	101.4	100.8
海南省	102.7	103.1	96.5	97.4	100.1	100.3	102.8	103.2	102.3	101.8	101.7	102	99.3	99.9	99.5	100.8

[truncated: 4 more sheets: 移动互联网用户(万户, 全体居民人均消费支出(元), 地方财政文化体育与传媒支出(亿元), 体育娱乐用品类商品零售价格指数(上年=100)]
