# Supplementary material
Source: Research Square preprint supplement (doi:10.21203/rs.3.rs-9228560/v1)
Supplement: Supplementary file 2 [file 8cdda3dd46b5be7a0908de0f.xlsx]

## Sheet: Sheet1
2000-2022年人均GDP				北京	天津	河北	山西	内蒙古	辽宁	吉林	黑龙江	上海	江苏	浙江	安徽	福建	江西	山东	河南	湖北	湖南	广东	广西	海南	重庆	四川	贵州	云南	西藏	陕西	甘肃	青海	宁夏	新疆
				93946.9	60786.2	28332.6	29310.5	40287.7	36222.2	28002.5	25638.6	92145.6	64763.7	57940.9	30658.7	53601.5	28771.3	41490.3	29145.5	38685.4	31734.6	51037.5	23265.7	29912.2	39016.4	28784	20908.5	25036.9	24832.8	34685	19686	26709.2	29707.9	30774.3
北京	93946.9		北京	0	33160.7	65614.3	64636.4	53659.1	57724.7	65944.4	68308.3	1801.3	29183.2	36006	63288.2	40345.3	65175.5	52456.6	64801.3	55261.5	62212.3	42909.3	70681.2	64034.7	54930.4	65162.8	73038.4	68910	69114	59261.9	74260.8	67237.7	64239	63172.6
天津	60786.2		天津	-33160.7	0	32453.6	31475.7	20498.4	24564	32783.7	35147.6	-31359.4	-3977.52	2845.3	30127.5	7184.65	32014.8	19295.9	31640.7	22100.8	29051.6	9748.65	37520.5	30874	21769.7	32002.1	39877.7	35749.3	35953.3	26101.2	41100.1	34077	31078.3	30011.9
河北	28332.6		河北	-65614.3	-32453.6	0	-977.87	-11955.1	-7889.57	330.13	2694.04	-63813	-36431.1	-29608.3	-2326.09	-25268.9	-438.739	-13157.7	-812.913	-10352.8	-3402	-22704.9	5066.96	-1579.61	-10683.8	-451.435	7424.13	3295.7	3499.78	-6352.35	8646.57	1623.43	-1375.3	-2441.7
山西	29310.5		山西	-64636.4	-31475.7	977.87	0	-10977.3	-6911.7	1308	3671.91	-62835.1	-35453.2	-28630.4	-1348.22	-24291	539.13	-12179.8	164.957	-9374.91	-2424.13	-21727	6044.83	-601.739	-9705.96	526.435	8402	4273.57	4477.65	-5374.48	9624.43	2601.3	-397.435	-1463.83
内蒙古	40287.7		内蒙古	-53659.1	-20498.4	11955.1	10977.3	0	4065.57	12285.3	14649.2	-51857.8	-24476	-17653.1	9629.04	-13313.8	11516.4	-1202.57	11142.2	1602.35	8553.13	-10749.8	17022.1	10375.5	1271.3	11503.7	19379.3	15250.8	15454.9	5602.78	20601.7	13578.6	10579.8	9513.43
辽宁	36222.2		辽宁	-57724.7	-24564	7889.57	6911.7	-4065.57	0	8219.7	10583.6	-55923.4	-28541.5	-21718.7	5563.48	-17379.3	7450.83	-5268.13	7076.65	-2463.22	4487.57	-14815.3	12956.5	6309.96	-2794.26	7438.13	15313.7	11185.3	11389.3	1537.22	16536.1	9513	6514.26	5447.87
吉林	28002.5		吉林	-65944.4	-32783.7	-330.13	-1308	-12285.3	-8219.7	0	2363.91	-64143.1	-36761.2	-29938.4	-2656.22	-25599	-768.87	-13487.8	-1143.04	-10682.9	-3732.13	-23035	4736.83	-1909.74	-11014	-781.565	7094	2965.57	3169.65	-6682.48	8316.43	1293.3	-1705.43	-2771.83
黑龙江	25638.6		黑龙江	-68308.3	-35147.6	-2694.04	-3671.91	-14649.2	-10583.6	-2363.91	0	-66507	-39125.1	-32302.3	-5020.13	-27963	-3132.78	-15851.7	-3506.96	-13046.8	-6096.04	-25399	2372.91	-4273.65	-13377.9	-3145.48	4730.09	601.652	805.739	-9046.39	5952.52	-1070.61	-4069.35	-5135.74
上海	92145.6		上海	-1801.3	31359.4	63813	62835.1	51857.8	55923.4	64143.1	66507	0	27381.9	34204.7	61486.9	38544	63374.2	50655.3	63000	53460.2	60411	41108	68879.9	62233.3	53129.1	63361.5	71237.1	67108.7	67312.7	57460.6	72459.5	65436.4	62437.7	61371.3
江苏	64763.7		江苏	-29183.2	3977.52	36431.1	35453.2	24476	28541.5	36761.2	39125.1	-27381.9	0	6822.83	34105	11162.2	35992.3	23273.4	35618.2	26078.3	33029.1	13726.2	41498	34851.5	25747.3	35979.7	43855.2	39726.8	39930.9	30078.7	45077.7	38054.5	35055.8	33989.4
浙江	57940.9		浙江	-36006	-2845.3	29608.3	28630.4	17653.1	21718.7	29938.4	32302.3	-34204.7	-6822.83	0	27282.2	4339.35	29169.5	16450.6	28795.3	19255.5	26206.3	6903.35	34675.2	28028.7	18924.4	29156.8	37032.4	32904	33108	23255.9	38254.8	31231.7	28233	27166.6
安徽	30658.7		安徽	-63288.2	-30127.5	2326.09	1348.22	-9629.04	-5563.48	2656.22	5020.13	-61486.9	-34105	-27282.2	0	-22942.8	1887.35	-10831.6	1513.17	-8026.7	-1075.91	-20378.8	7393.04	746.478	-8357.74	1874.65	9750.22	5621.78	5825.87	-4026.26	10972.7	3949.52	950.783	-115.609
福建	53601.5		福建	-40345.3	-7184.65	25268.9	24291	13313.8	17379.3	25599	27963	-38544	-11162.2	-4339.35	22942.8	0	24830.2	12111.2	24456	14916.1	21866.9	2564	30335.9	23689.3	14585.1	24817.5	32693	28564.6	28768.7	18916.6	33915.5	26892.3	23893.6	22827.2
江西	28771.3		江西	-65175.5	-32014.8	438.739	-539.13	-11516.4	-7450.83	768.87	3132.78	-63374.2	-35992.3	-29169.5	-1887.35	-24830.2	0	-12719	-374.174	-9914.04	-2963.26	-22266.2	5505.7	-1140.87	-10245.1	-12.6957	7862.87	3734.43	3938.52	-5913.61	9085.3	2062.17	-936.565	-2002.96
山东	41490.3		山东	-52456.6	-19295.9	13157.7	12179.8	1202.57	5268.13	13487.8	15851.7	-50655.3	-23273.4	-16450.6	10831.6	-12111.2	12719	0	12344.8	2804.91	9755.7	-9547.22	18224.7	11578.1	2473.87	12706.3	20581.8	16453.4	16657.5	6805.35	21804.3	14781.1	11782.4	10716
河南	29145.5		河南	-64801.3	-31640.7	812.913	-164.957	-11142.2	-7076.65	1143.04	3506.96	-63000	-35618.2	-28795.3	-1513.17	-24456	374.174	-12344.8	0	-9539.87	-2589.09	-21892	5879.87	-766.696	-9870.91	361.478	8237.04	4108.61	4312.7	-5539.43	9459.48	2436.35	-562.391	-1628.78
湖北	38685.4		湖北	-55261.5	-22100.8	10352.8	9374.91	-1602.35	2463.22	10682.9	13046.8	-53460.2	-26078.3	-19255.5	8026.7	-14916.1	9914.04	-2804.91	9539.87	0	6950.78	-12352.1	15419.7	8773.17	-331.043	9901.35	17776.9	13648.5	13852.6	4000.43	18999.3	11976.2	8977.48	7911.09
湖南	31734.6		湖南	-62212.3	-29051.6	3402	2424.13	-8553.13	-4487.57	3732.13	6096.04	-60411	-33029.1	-26206.3	1075.91	-21866.9	2963.26	-9755.7	2589.09	-6950.78	0	-19302.9	8468.96	1822.39	-7281.83	2950.57	10826.1	6697.7	6901.78	-2950.35	12048.6	5025.43	2026.7	960.304
广东	51037.5		广东	-42909.3	-9748.65	22704.9	21727	10749.8	14815.3	23035	25399	-41108	-13726.2	-6903.35	20378.8	-2564	22266.2	9547.22	21892	12352.1	19302.9	0	27771.9	21125.3	12021.1	22253.5	30129	26000.6	26204.7	16352.6	31351.5	24328.3	21329.6	20263.2
广西	23265.7		广西	-70681.2	-37520.5	-5066.96	-6044.83	-17022.1	-12956.5	-4736.83	-2372.91	-68879.9	-41498	-34675.2	-7393.04	-30335.9	-5505.7	-18224.7	-5879.87	-15419.7	-8468.96	-27771.9	0	-6646.57	-15750.8	-5518.39	2357.17	-1771.26	-1567.17	-11419.3	3579.61	-3443.52	-6442.26	-7508.65
海南	29912.2		海南	-64034.7	-30874	1579.61	601.739	-10375.5	-6309.96	1909.74	4273.65	-62233.3	-34851.5	-28028.7	-746.478	-23689.3	1140.87	-11578.1	766.696	-8773.17	-1822.39	-21125.3	6646.57	0	-9104.22	1128.17	9003.74	4875.3	5079.39	-4772.74	10226.2	3203.04	204.304	-862.087
重庆	39016.4		重庆	-54930.4	-21769.7	10683.8	9705.96	-1271.3	2794.26	11014	13377.9	-53129.1	-25747.3	-18924.4	8357.74	-14585.1	10245.1	-2473.87	9870.91	331.043	7281.83	-12021.1	15750.8	9104.22	0	10232.4	18108	13979.5	14183.6	4331.48	19330.4	12307.3	9308.52	8242.13
四川	28784		四川	-65162.8	-32002.1	451.435	-526.435	-11503.7	-7438.13	781.565	3145.48	-63361.5	-35979.7	-29156.8	-1874.65	-24817.5	12.6957	-12706.3	-361.478	-9901.35	-2950.57	-22253.5	5518.39	-1128.17	-10232.4	0	7875.57	3747.13	3951.22	-5900.91	9098	2074.87	-923.87	-1990.26
贵州	20908.5		贵州	-73038.4	-39877.7	-7424.13	-8402	-19379.3	-15313.7	-7094	-4730.09	-71237.1	-43855.2	-37032.4	-9750.22	-32693	-7862.87	-20581.8	-8237.04	-17776.9	-10826.1	-30129	-2357.17	-9003.74	-18108	-7875.57	0	-4128.43	-3924.35	-13776.5	1222.43	-5800.7	-8799.43	-9865.83
云南	25036.9		云南	-68910	-35749.3	-3295.7	-4273.57	-15250.8	-11185.3	-2965.57	-601.652	-67108.7	-39726.8	-32904	-5621.78	-28564.6	-3734.43	-16453.4	-4108.61	-13648.5	-6697.7	-26000.6	1771.26	-4875.3	-13979.5	-3747.13	4128.43	0	204.087	-9648.04	5350.87	-1672.26	-4671	-5737.39
西藏	24832.8		西藏	-69114	-35953.3	-3499.78	-4477.65	-15454.9	-11389.3	-3169.65	-805.739	-67312.7	-39930.9	-33108	-5825.87	-28768.7	-3938.52	-16657.5	-4312.7	-13852.6	-6901.78	-26204.7	1567.17	-5079.39	-14183.6	-3951.22	3924.35	-204.087	0	-9852.13	5146.78	-1876.35	-4875.09	-5941.48
陕西	34685		陕西	-59261.9	-26101.2	6352.35	5374.48	-5602.78	-1537.22	6682.48	9046.39	-57460.6	-30078.7	-23255.9	4026.26	-18916.6	5913.61	-6805.35	5539.43	-4000.43	2950.35	-16352.6	11419.3	4772.74	-4331.48	5900.91	13776.5	9648.04	9852.13	0	14998.9	7975.78	4977.04	3910.65
甘肃	19686		甘肃	-74260.8	-41100.1	-8646.57	-9624.43	-20601.7	-16536.1	-8316.43	-5952.52	-72459.5	-45077.7	-38254.8	-10972.7	-33915.5	-9085.3	-21804.3	-9459.48	-18999.3	-12048.6	-31351.5	-3579.61	-10226.2	-19330.4	-9098	-1222.43	-5350.87	-5146.78	-14998.9	0	-7023.13	-10021.9	-11088.3
青海	26709.2		青海	-67237.7	-34077	-1623.43	-2601.3	-13578.6	-9513	-1293.3	1070.61	-65436.4	-38054.5	-31231.7	-3949.52	-26892.3	-2062.17	-14781.1	-2436.35	-11976.2	-5025.43	-24328.3	3443.52	-3203.04	-12307.3	-2074.87	5800.7	1672.26	1876.35	-7975.78	7023.13	0	-2998.74	-4065.13
宁夏	29707.9		宁夏	-64239	-31078.3	1375.3	397.435	-10579.8	-6514.26	1705.43	4069.35	-62437.7	-35055.8	-28233	-950.783	-23893.6	936.565	-11782.4	562.391	-8977.48	-2026.7	-21329.6	6442.26	-204.304	-9308.52	923.87	8799.43	4671	4875.09	-4977.04	10021.9	2998.74	0	-1066.39
新疆	30774.3		新疆	-63172.6	-30011.9	2441.7	1463.83	-9513.43	-5447.87	2771.83	5135.74	-61371.3	-33989.4	-27166.6	115.609	-22827.2	2002.96	-10716	1628.78	-7911.09	-960.304	-20263.2	7508.65	862.087	-8242.13	1990.26	9865.83	5737.39	5941.48	-3910.65	11088.3	4065.13	1066.39	0
	1/绝对值			北京	天津	河北	山西	内蒙古	辽宁	吉林	黑龙江	上海	江苏	浙江	安徽	福建	江西	山东	河南	湖北	湖南	广东	广西	海南	重庆	四川	贵州	云南	西藏	陕西	甘肃	青海	宁夏	新疆
			北京	0	3.01562e-05	1.52406e-05	1.54712e-05	1.86362e-05	1.73236e-05	1.51643e-05	1.46395e-05	0.000555153	3.42663e-05	2.77731e-05	1.58007e-05	2.4786e-05	1.53432e-05	1.90634e-05	1.54318e-05	1.80958e-05	1.6074e-05	2.33049e-05	1.4148e-05	1.56165e-05	1.82048e-05	1.53462e-05	1.36914e-05	1.45117e-05	1.44688e-05	1.68742e-05	1.34661e-05	1.48726e-05	1.55669e-05	1.58297e-05	0.00107432	37.4264	37.4264	37.4264	37.4264	37.4264	37.4264	37.4264	37.4264	37.4264	37.4264	37.4264	37.4264	37.4264	37.4264
			天津	3.01562e-05	0	3.08133e-05	3.17705e-05	4.87842e-05	4.071e-05	3.0503e-05	2.84514e-05	3.18884e-05	0.000251413	0.000351456	3.31923e-05	0.000139186	3.12355e-05	5.18246e-05	3.16049e-05	4.52473e-05	3.44216e-05	0.000102578	2.66521e-05	3.23898e-05	4.59353e-05	3.12479e-05	2.50767e-05	2.79726e-05	2.78138e-05	3.83124e-05	2.43308e-05	2.93453e-05	3.21768e-05	3.33202e-05	0.00171981	10.0495	10.0495	10.0495	10.0495	10.0495	10.0495	10.0495	10.0495	10.0495	10.0495	10.0495	10.0495	10.0495	10.0495
			河北	1.52406e-05	3.08133e-05	0	0.00102263	8.36461e-05	0.00012675	0.00302911	0.000371189	1.56708e-05	2.74491e-05	3.37744e-05	0.000429907	3.95743e-05	0.00227926	7.60011e-05	0.00123014	9.65924e-05	0.000293945	4.40433e-05	0.000197357	0.000633068	9.35994e-05	0.00221516	0.000134696	0.000303426	0.000285732	0.000157422	0.000115653	0.000615978	0.000727112	0.000409551	0.0151345	214.14	214.14	214.14	214.14	214.14	214.14	214.14	214.14	214.14	214.14	214.14	214.14	214.14	214.14
			山西	1.54712e-05	3.17705e-05	0.00102263	0	9.10974e-05	0.000144682	0.000764526	0.000272338	1.59147e-05	2.82062e-05	3.49279e-05	0.00074172	4.11674e-05	0.00185484	8.2103e-05	0.0060622	0.000106668	0.000412519	4.60256e-05	0.000165431	0.00166185	0.00010303	0.00189957	0.000119019	0.000233997	0.000223331	0.000186065	0.000103902	0.000384423	0.00251614	0.000683141	0.0200487	128.325	128.325	128.325	128.325	128.325	128.325	128.325	128.325	128.325	128.325	128.325	128.325	128.325	128.325
			内蒙古	1.86362e-05	4.87842e-05	8.36461e-05	9.10974e-05	0	0.000245968	8.13984e-05	6.82632e-05	1.92835e-05	4.08564e-05	5.66472e-05	0.000103852	7.51101e-05	8.68328e-05	0.000831556	8.97487e-05	0.000624084	0.000116916	9.30251e-05	5.87472e-05	9.63807e-05	0.000786594	8.69286e-05	5.16016e-05	6.55702e-05	6.47043e-05	0.000178483	4.85397e-05	7.36455e-05	9.45195e-05	0.000105115	0.00448653	32.2398	32.2398	32.2398	32.2398	32.2398	32.2398	32.2398	32.2398	32.2398	32.2398	32.2398	32.2398	32.2398	32.2398
			辽宁	1.73236e-05	4.071e-05	0.00012675	0.000144682	0.000245968	0	0.000121659	9.44857e-05	1.78816e-05	3.50367e-05	4.60433e-05	0.000179744	5.75396e-05	0.000134213	0.000189821	0.00014131	0.000405973	0.000222838	6.74976e-05	7.71812e-05	0.00015848	0.000357876	0.000134442	6.5301e-05	8.94034e-05	8.78013e-05	0.000650526	6.04736e-05	0.000105119	0.000153509	0.000183558	0.00441315	28.8965	28.8965	28.8965	28.8965	28.8965	28.8965	28.8965	28.8965	28.8965	28.8965	28.8965	28.8965	28.8965	28.8965
			吉林	1.51643e-05	3.0503e-05	0.00302911	0.000764526	8.13984e-05	0.000121659	0	0.000423027	1.55901e-05	2.72026e-05	3.34019e-05	0.000376475	3.9064e-05	0.00130061	7.41409e-05	0.000874857	9.36074e-05	0.000267943	4.34121e-05	0.000211112	0.000523632	9.07939e-05	0.00127948	0.000140964	0.000337204	0.000315492	0.000149645	0.000120244	0.000773213	0.000586361	0.000360773	0.0125006	64.8417	64.8417	64.8417	64.8417	64.8417	64.8417	64.8417	64.8417	64.8417	64.8417	64.8417	64.8417	64.8417	64.8417
			黑龙江	1.46395e-05	2.84514e-05	0.000371189	0.000272338	6.82632e-05	9.44857e-05	0.000423027	0	1.5036e-05	2.5559e-05	3.09575e-05	0.000199198	3.57616e-05	0.000319205	6.30846e-05	0.000285148	7.6647e-05	0.000164041	3.93717e-05	0.000421423	0.000233992	7.47503e-05	0.000317917	0.000211413	0.00166209	0.0012411	0.000110541	0.000167996	0.000934048	0.00024574	0.000194714	0.00834212	324.008	324.008	324.008	324.008	324.008	324.008	324.008	324.008	324.008	324.008	324.008	324.008	324.008	324.008
			上海	0.000555153	3.18884e-05	1.56708e-05	1.59147e-05	1.92835e-05	1.78816e-05	1.55901e-05	1.5036e-05	0	3.65205e-05	2.92358e-05	1.62636e-05	2.59443e-05	1.57793e-05	1.97413e-05	1.5873e-05	1.87055e-05	1.65533e-05	2.43261e-05	1.4518e-05	1.60686e-05	1.88221e-05	1.57824e-05	1.40376e-05	1.49012e-05	1.4856e-05	1.74032e-05	1.38008e-05	1.5282e-05	1.6016e-05	1.62943e-05	0.00109314	37.4976	37.4976	37.4976	37.4976	37.4976	37.4976	37.4976	37.4976	37.4976	37.4976	37.4976	37.4976	37.4976	37.4976
			江苏	3.42663e-05	0.000251413	2.74491e-05	2.82062e-05	4.08564e-05	3.50367e-05	2.72026e-05	2.5559e-05	3.65205e-05	0	0.000146567	2.93212e-05	8.95883e-05	2.77837e-05	4.29675e-05	2.80756e-05	3.83461e-05	3.02763e-05	7.28535e-05	2.40975e-05	2.86932e-05	3.88391e-05	2.77935e-05	2.28023e-05	2.51719e-05	2.50433e-05	3.32461e-05	2.21839e-05	2.62781e-05	2.8526e-05	2.94209e-05	0.00134438	14.0076	14.0076	14.0076	14.0076	14.0076	14.0076	14.0076	14.0076	14.0076	14.0076	14.0076	14.0076	14.0076	14.0076
			浙江	2.77731e-05	0.000351456	3.37744e-05	3.49279e-05	5.66472e-05	4.60433e-05	3.34019e-05	3.09575e-05	2.92358e-05	0.000146567	0	3.6654e-05	0.000230449	3.42824e-05	6.07882e-05	3.47278e-05	5.19333e-05	3.81588e-05	0.000144857	2.8839e-05	3.56778e-05	5.28417e-05	3.42973e-05	2.70034e-05	3.03915e-05	3.02041e-05	4.29998e-05	2.61405e-05	3.20188e-05	3.54196e-05	3.681e-05	0.00183528	16.332	16.332	16.332	16.332	16.332	16.332	16.332	16.332	16.332	16.332	16.332	16.332	16.332	16.332
			安徽	1.58007e-05	3.31923e-05	0.000429907	0.00074172	0.000103852	0.000179744	0.000376475	0.000199198	1.62636e-05	2.93212e-05	3.6654e-05	0	4.35866e-05	0.000529844	9.23224e-05	0.000660863	0.000124584	0.000929443	4.90705e-05	0.000135262	0.00133962	0.00011965	0.000533432	0.000102562	0.00017788	0.000171648	0.000248369	9.11357e-05	0.000253195	0.00105177	0.00864987	0.0174662	246.847	246.847	246.847	246.847	246.847	246.847	246.847	246.847	246.847	246.847	246.847	246.847	246.847	246.847
			福建	2.4786e-05	0.000139186	3.95743e-05	4.11674e-05	7.51101e-05	5.75396e-05	3.9064e-05	3.57616e-05	2.59443e-05	8.95883e-05	0.000230449	4.35866e-05	0	4.02736e-05	8.25681e-05	4.08898e-05	6.70415e-05	4.57312e-05	0.000390016	3.29643e-05	4.22131e-05	6.85632e-05	4.02942e-05	3.05875e-05	3.50084e-05	3.476e-05	5.28637e-05	2.94851e-05	3.71853e-05	4.18522e-05	4.38074e-05	0.00199786	29.4774	29.4774	29.4774	29.4774	29.4774	29.4774	29.4774	29.4774	29.4774	29.4774	29.4774	29.4774	29.4774	29.4774
			江西	1.53432e-05	3.12355e-05	0.00227926	0.00185484	8.68328e-05	0.000134213	0.00130061	0.000319205	1.57793e-05	2.77837e-05	3.42824e-05	0.000529844	4.02736e-05	0	7.86228e-05	0.00267255	0.000100867	0.000337466	4.49112e-05	0.00018163	0.000876524	9.76078e-05	0.0787671	0.00012718	0.000267778	0.000253902	0.000169101	0.000110068	0.000484925	0.00106773	0.000499262	0.0928068	204.718	204.718	204.718	204.718	204.718	204.718	204.718	204.718	204.718	204.718	204.718	204.718	204.718	204.718
			山东	1.90634e-05	5.18246e-05	7.60011e-05	8.2103e-05	0.000831556	0.000189821	7.41409e-05	6.30846e-05	1.97413e-05	4.29675e-05	6.07882e-05	9.23224e-05	8.25681e-05	7.86228e-05	0	8.10059e-05	0.000356517	0.000102504	0.000104743	5.48707e-05	8.63701e-05	0.000404225	7.87014e-05	4.85866e-05	6.07777e-05	6.00331e-05	0.000146943	4.58626e-05	6.76538e-05	8.48724e-05	9.33184e-05	0.00364159	33.1403	33.1403	33.1403	33.1403	33.1403	33.1403	33.1403	33.1403	33.1403	33.1403	33.1403	33.1403	33.1403	33.1403
			河南	1.54318e-05	3.16049e-05	0.00123014	0.0060622	8.97487e-05	0.00014131	0.000874857	0.000285148	1.5873e-05	2.80756e-05	3.47278e-05	0.000660863	4.08898e-05	0.00267255	8.10059e-05	0	0.000104823	0.000386237	4.56788e-05	0.000170072	0.0013043	0.000101308	0.00276642	0.000121403	0.000243391	0.000231874	0.000180524	0.000105714	0.00041045	0.00177812	0.000613955	0.0208287	324.406	324.406	324.406	324.406	324.406	324.406	324.406	324.406	324.406	324.406	324.406	324.406	324.406	324.406
			湖北	1.80958e-05	4.52473e-05	9.65924e-05	0.000106668	0.000624084	0.000405973	9.36074e-05	7.6647e-05	1.87055e-05	3.83461e-05	5.19333e-05	0.000124584	6.70415e-05	0.000100867	0.000356517	0.000104823	0	0.000143869	8.09577e-05	6.48519e-05	0.000113984	0.00302075	0.000100996	5.62527e-05	7.32682e-05	7.21888e-05	0.000249973	5.26334e-05	8.34988e-05	0.00011139	0.000126405	0.00668075	56.6399	56.6399	56.6399	56.6399	56.6399	56.6399	56.6399	56.6399	56.6399	56.6399	56.6399	56.6399	56.6399	56.6399
			湖南	1.6074e-05	3.44216e-05	0.000293945	0.000412519	0.000116916	0.000222838	0.000267943	0.000164041	1.65533e-05	3.02763e-05	3.81588e-05	0.000929443	4.57312e-05	0.000337466	0.000102504	0.000386237	0.000143869	0	5.18057e-05	0.000118078	0.00054873	0.000137328	0.000338918	9.23691e-05	0.000149305	0.00014489	0.000338943	8.29974e-05	0.000198988	0.000493414	0.00104134	0.00729604	143.838	143.838	143.838	143.838	143.838	143.838	143.838	143.838	143.838	143.838	143.838	143.838	143.838	143.838
			广东	2.33049e-05	0.000102578	4.40433e-05	4.60256e-05	9.30251e-05	6.74976e-05	4.34121e-05	3.93717e-05	2.43261e-05	7.28535e-05	0.000144857	4.90705e-05	0.000390016	4.49112e-05	0.000104743	4.56788e-05	8.09577e-05	5.18057e-05	0	3.60077e-05	4.73366e-05	8.31872e-05	4.49368e-05	3.31906e-05	3.84606e-05	3.81611e-05	6.11525e-05	3.18964e-05	4.11043e-05	4.68832e-05	4.93505e-05	0.00202015	28.1951	28.1951	28.1951	28.1951	28.1951	28.1951	28.1951	28.1951	28.1951	28.1951	28.1951	28.1951	28.1951	28.1951
			广西	1.4148e-05	2.66521e-05	0.000197357	0.000165431	5.87472e-05	7.71812e-05	0.000211112	0.000421423	1.4518e-05	2.40975e-05	2.8839e-05	0.000135262	3.29643e-05	0.00018163	5.48707e-05	0.000170072	6.48519e-05	0.000118078	3.60077e-05	0	0.000150454	6.34889e-05	0.000181212	0.000424237	0.00056457	0.000638091	8.7571e-05	0.00027936	0.0002904	0.000155225	0.00013318	0.00500103	64.0462	64.0462	64.0462	64.0462	64.0462	64.0462	64.0462	64.0462	64.0462	64.0462	64.0462	64.0462	64.0462	64.0462
			海南	1.56165e-05	3.23898e-05	0.000633068	0.00166185	9.63807e-05	0.00015848	0.000523632	0.000233992	1.60686e-05	2.86932e-05	3.56778e-05	0.00133962	4.22131e-05	0.000876524	8.63701e-05	0.0013043	0.000113984	0.00054873	4.73366e-05	0.000150454	0	0.000109839	0.000886388	0.000111065	0.000205115	0.000196874	0.000209523	9.77883e-05	0.000312203	0.00489466	0.00115998	0.0161288	143.571	143.571	143.571	143.571	143.571	143.571	143.571	143.571	143.571	143.571	143.571	143.571	143.571	143.571
			重庆	1.82048e-05	4.59353e-05	9.35994e-05	0.00010303	0.000786594	0.000357876	9.07939e-05	7.47503e-05	1.88221e-05	3.88391e-05	5.28417e-05	0.00011965	6.85632e-05	9.76078e-05	0.000404225	0.000101308	0.00302075	0.000137328	8.31872e-05	6.34889e-05	0.000109839	0	9.77289e-05	5.52243e-05	7.15332e-05	7.05039e-05	0.000230868	5.1732e-05	8.12528e-05	0.000107428	0.000121328	0.00677483	52.578	52.578	52.578	52.578	52.578	52.578	52.578	52.578	52.578	52.578	52.578	52.578	52.578	52.578
			四川	1.53462e-05	3.12479e-05	0.00221516	0.00189957	8.69286e-05	0.000134442	0.00127948	0.000317917	1.57824e-05	2.77935e-05	3.42973e-05	0.000533432	4.02942e-05	0.0787671	7.87014e-05	0.00276642	0.000100996	0.000338918	4.49368e-05	0.000181212	0.000886388	9.77289e-05	0	0.000126975	0.000266871	0.000253087	0.000169465	0.000109914	0.000481958	0.0010824	0.000502447	0.0928872	201.13	201.13	201.13	201.13	201.13	201.13	201.13	201.13	201.13	201.13	201.13	201.13	201.13	201.13
			贵州	1.36914e-05	2.50767e-05	0.000134696	0.000119019	5.16016e-05	6.5301e-05	0.000140964	0.000211413	1.40376e-05	2.28023e-05	2.70034e-05	0.000102562	3.05875e-05	0.00012718	4.85866e-05	0.000121403	5.62527e-05	9.23691e-05	3.31906e-05	0.000424237	0.000111065	5.52243e-05	0.000126975	0	0.000242223	0.000254819	7.25875e-05	0.00081804	0.000172393	0.000113644	0.00010136	0.0039303	43.6696	43.6696	43.6696	43.6696	43.6696	43.6696	43.6696	43.6696	43.6696	43.6696	43.6696	43.6696	43.6696	43.6696
			云南	1.45117e-05	2.79726e-05	0.000303426	0.000233997	6.55702e-05	8.94034e-05	0.000337204	0.00166209	1.49012e-05	2.51719e-05	3.03915e-05	0.00017788	3.50084e-05	0.000267778	6.07777e-05	0.000243391	7.32682e-05	0.000149305	3.84606e-05	0.00056457	0.000205115	7.15332e-05	0.000266871	0.000242223	0	0.00489987	0.000103648	0.000186886	0.000597993	0.000214087	0.000174295	0.0113776	46.5267	46.5267	46.5267	46.5267	46.5267	46.5267	46.5267	46.5267	46.5267	46.5267	46.5267	46.5267	46.5267	46.5267
			西藏	1.44688e-05	2.78138e-05	0.000285732	0.000223331	6.47043e-05	8.78013e-05	0.000315492	0.0012411	1.4856e-05	2.50433e-05	3.02041e-05	0.000171648	3.476e-05	0.000253902	6.00331e-05	0.000231874	7.21888e-05	0.00014489	3.81611e-05	0.000638091	0.000196874	7.05039e-05	0.000253087	0.000254819	0.00489987	0	0.000101501	0.000194296	0.00053295	0.000205125	0.000168308	0.0108534	61.0428	61.0428	61.0428	61.0428	61.0428	61.0428	61.0428	61.0428	61.0428	61.0428	61.0428	61.0428	61.0428	61.0428
			陕西	1.68742e-05	3.83124e-05	0.000157422	0.000186065	0.000178483	0.000650526	0.000149645	0.000110541	1.74032e-05	3.32461e-05	4.29998e-05	0.000248369	5.28637e-05	0.000169101	0.000146943	0.000180524	0.000249973	0.000338943	6.11525e-05	8.7571e-05	0.000209523	0.000230868	0.000169465	7.25875e-05	0.000103648	0.000101501	0	6.66715e-05	0.00012538	0.000200922	0.000255712	0.00465324	66.0306	66.0306	66.0306	66.0306	66.0306	66.0306	66.0306	66.0306	66.0306	66.0306	66.0306	66.0306	66.0306	66.0306
			甘肃	1.34661e-05	2.43308e-05	0.000115653	0.000103902	4.85397e-05	6.04736e-05	0.000120244	0.000167996	1.38008e-05	2.21839e-05	2.61405e-05	9.11357e-05	2.94851e-05	0.000110068	4.58626e-05	0.000105714	5.26334e-05	8.29974e-05	3.18964e-05	0.00027936	9.77883e-05	5.1732e-05	0.000109914	0.00081804	0.000186886	0.000194296	6.66715e-05	0	0.000142387	9.97818e-05	9.01855e-05	0.00340356	37.6219	37.6219	37.6219	37.6219	37.6219	37.6219	37.6219	37.6219	37.6219	37.6219	37.6219	37.6219	37.6219	37.6219
			青海	1.48726e-05	2.93453e-05	0.000615978	0.000384423	7.36455e-05	0.000105119	0.000773213	0.000934048	1.5282e-05	2.62781e-05	3.20188e-05	0.000253195	3.71853e-05	0.000484925	6.76538e-05	0.00041045	8.34988e-05	0.000198988	4.11043e-05	0.0002904	0.000312203	8.12528e-05	0.000481958	0.000172393	0.000597993	0.00053295	0.00012538	0.000142387	0	0.000333473	0.000245995	0.00789761	133.368	133.368	133.368	133.368	133.368	133.368	133.368	133.368	133.368	133.368	133.368	133.368	133.368	133.368
			宁夏	1.55669e-05	3.21768e-05	0.000727112	0.00251614	9.45195e-05	0.000153509	0.000586361	0.00024574	1.6016e-05	2.8526e-05	3.54196e-05	0.00105177	4.18522e-05	0.00106773	8.48724e-05	0.00177812	0.00011139	0.000493414	4.68832e-05	0.000155225	0.00489466	0.000107428	0.0010824	0.000113644	0.000214087	0.000205125	0.000200922	9.97818e-05	0.000333473	0	0.000937742	0.0174716	222.935	222.935	222.935	222.935	222.935	222.935	222.935	222.935	222.935	222.935	222.935	222.935	222.935	222.935
			新疆	1.58297e-05	3.33202e-05	0.000409551	0.000683141	0.000105115	0.000183558	0.000360773	0.000194714	1.62943e-05	2.94209e-05	3.681e-05	0.00864987	4.38074e-05	0.000499262	9.33184e-05	0.000613955	0.000126405	0.00104134	4.93505e-05	0.00013318	0.00115998	0.000121328	0.000502447	0.00010136	0.000174295	0.000168308	0.000255712	9.01855e-05	0.000245995	0.000937742	0	0.0170764	143.523	143.523	143.523	143.523	143.523	143.523	143.523	143.523	143.523	143.523	143.523	143.523	143.523	143.523
	1/绝对值行标准化
				北京	天津	河北	山西	内蒙古	辽宁	吉林	黑龙江	上海	江苏	浙江	安徽	福建	江西	山东	河南	湖北	湖南	广东	广西	海南	重庆	四川	贵州	云南	西藏	陕西	甘肃	青海	宁夏	新疆
			北京	0	8.05747e-07	4.07215e-07	4.13376e-07	4.97942e-07	4.62872e-07	4.05177e-07	3.91155e-07	1.48332e-05	9.15567e-07	7.42075e-07	4.22182e-07	6.62261e-07	4.09957e-07	5.09357e-07	4.12324e-07	4.83504e-07	4.29484e-07	6.22688e-07	3.78023e-07	4.17261e-07	4.86418e-07	4.10037e-07	3.65823e-07	3.8774e-07	3.86595e-07	4.50865e-07	3.59801e-07	3.97383e-07	4.15934e-07	4.22955e-07
			天津	0.0175346	0	3.06616e-06	3.16142e-06	4.85441e-06	4.05096e-06	3.03528e-06	2.83114e-06	3.17314e-06	2.50175e-05	3.49726e-05	3.30289e-06	1.38501e-05	3.10818e-06	5.15695e-06	3.14494e-06	4.50246e-06	3.42521e-06	1.02073e-05	2.65209e-06	3.22303e-06	4.57092e-06	3.10941e-06	2.49533e-06	2.78349e-06	2.76769e-06	3.81238e-06	2.42111e-06	2.92009e-06	3.20185e-06	3.31562e-06
			河北	0.00100701	1.43893e-07	0	4.77552e-06	3.90614e-07	5.919e-07	1.41454e-05	1.73339e-06	7.31801e-08	1.28183e-07	1.57721e-07	2.00759e-06	1.84806e-07	1.06438e-05	3.54913e-07	5.74457e-06	4.51071e-07	1.37267e-06	2.05675e-07	9.21626e-07	2.95633e-06	4.37094e-07	1.03444e-05	6.29008e-07	1.41695e-06	1.33432e-06	7.35136e-07	5.4008e-07	2.87652e-06	3.39549e-06	1.91254e-06
			山西	0.000771679	2.4758e-07	7.9691e-06	0	7.09898e-07	1.12747e-06	5.95775e-06	2.12226e-06	1.24019e-07	2.19803e-07	2.72184e-07	5.78003e-06	3.20807e-07	1.44543e-05	6.39807e-07	4.72412e-05	8.31233e-07	3.21465e-06	3.58665e-07	1.28916e-06	1.29504e-05	8.02882e-07	1.48029e-05	9.27486e-07	1.82348e-06	1.74036e-06	1.44995e-06	8.09683e-07	2.99571e-06	1.96076e-05	5.32354e-06
			内蒙古	0.0041538	1.51317e-06	2.5945e-06	2.82562e-06	0	7.62935e-06	2.52478e-06	2.11736e-06	5.98128e-07	1.26727e-06	1.75706e-06	3.22125e-06	2.32974e-06	2.69334e-06	2.57929e-05	2.78379e-06	1.93576e-05	3.62646e-06	2.88542e-06	1.8222e-06	2.9895e-06	2.43983e-05	2.69632e-06	1.60056e-06	2.03383e-06	2.00697e-06	5.53611e-06	1.50558e-06	2.28431e-06	2.93177e-06	3.2604e-06
			辽宁	0.00392545	1.40882e-06	4.38634e-06	5.00692e-06	8.51205e-06	0	4.21017e-06	3.2698e-06	6.18816e-07	1.21249e-06	1.59339e-06	6.22027e-06	1.99123e-06	4.64463e-06	6.56899e-06	4.89021e-06	1.40492e-05	7.7116e-06	2.33584e-06	2.67096e-06	5.4844e-06	1.23848e-05	4.65256e-06	2.25983e-06	3.09392e-06	3.03848e-06	2.25123e-05	2.09277e-06	3.63779e-06	5.31239e-06	6.35227e-06
			吉林	0.00121308	4.70422e-07	4.67154e-05	1.17906e-05	1.25534e-06	1.87625e-06	0	6.524e-06	2.40434e-07	4.19523e-07	5.1513e-07	5.80606e-06	6.02451e-07	2.00582e-05	1.14341e-06	1.34922e-05	1.44363e-06	4.13227e-06	6.69509e-07	3.2558e-06	8.07553e-06	1.40024e-06	1.97324e-05	2.17397e-06	5.20041e-06	4.86557e-06	2.30785e-06	1.85442e-06	1.19246e-05	9.04295e-06	5.5639e-06
			黑龙江	0.00175489	8.78108e-08	1.14562e-06	8.40527e-07	2.10684e-07	2.91615e-07	1.30561e-06	0	4.64063e-08	7.88839e-08	9.55455e-08	6.14793e-07	1.10372e-07	9.85176e-07	1.947e-07	8.80063e-07	2.36559e-07	5.06286e-07	1.21514e-07	1.30065e-06	7.22179e-07	2.30705e-07	9.81199e-07	6.52491e-07	5.12978e-06	3.83045e-06	3.41168e-07	5.18493e-07	2.88279e-06	7.58436e-07	6.00954e-07
			上海	0.50785	8.50412e-07	4.17915e-07	4.24419e-07	5.1426e-07	4.76874e-07	4.15764e-07	4.00986e-07	0	9.73944e-07	7.79671e-07	4.33725e-07	6.91894e-07	4.20808e-07	5.26468e-07	4.23308e-07	4.98846e-07	4.4145e-07	6.48739e-07	3.87172e-07	4.28523e-07	5.01954e-07	4.20893e-07	3.74361e-07	3.97391e-07	3.96186e-07	4.64116e-07	3.68045e-07	4.07547e-07	4.2712e-07	4.34542e-07
			江苏	0.0254885	1.79484e-05	1.95959e-06	2.01364e-06	2.91674e-06	2.50127e-06	1.94199e-06	1.82466e-06	2.6072e-06	0	1.04634e-05	2.09324e-06	6.39571e-06	1.98348e-06	3.06745e-06	2.00432e-06	2.73753e-06	2.16143e-06	5.20102e-06	1.72032e-06	2.04841e-06	2.77272e-06	1.98418e-06	1.62786e-06	1.79703e-06	1.78784e-06	2.37344e-06	1.58371e-06	1.87599e-06	2.03647e-06	2.10036e-06
			浙江	0.0151329	2.15194e-05	2.06798e-06	2.13861e-06	3.46847e-06	2.8192e-06	2.04518e-06	1.89551e-06	1.79009e-06	8.97419e-06	0	2.2443e-06	1.41103e-05	2.09909e-06	3.72202e-06	2.12636e-06	3.17984e-06	2.33644e-06	8.86952e-06	1.7658e-06	2.18453e-06	3.23547e-06	2.1e-06	1.6534e-06	1.86085e-06	1.84938e-06	2.63285e-06	1.60057e-06	1.96049e-06	2.16872e-06	2.25385e-06
			安徽	0.000904645	1.34465e-07	1.74159e-06	3.00477e-06	4.20715e-07	7.28157e-07	1.52513e-06	8.06968e-07	6.58854e-08	1.18783e-07	1.48488e-07	0	1.76573e-07	2.14644e-06	3.74006e-07	2.67721e-06	5.04702e-07	3.76525e-06	1.98789e-07	5.47959e-07	5.42693e-06	4.84711e-07	2.16098e-06	4.15487e-07	7.20605e-07	6.95362e-07	1.00617e-06	3.69198e-07	1.02572e-06	4.26079e-06	3.50414e-05
			福建	0.0124063	4.72177e-06	1.34253e-06	1.39658e-06	2.54806e-06	1.95199e-06	1.32522e-06	1.21319e-06	8.80144e-07	3.03922e-06	7.81783e-06	1.47865e-06	0	1.36625e-06	2.80106e-06	1.38716e-06	2.27434e-06	1.5514e-06	1.3231e-05	1.11829e-06	1.43205e-06	2.32596e-06	1.36695e-06	1.03766e-06	1.18763e-06	1.17921e-06	1.79336e-06	1.00026e-06	1.26149e-06	1.41981e-06	1.48613e-06
			江西	0.000165324	1.52578e-07	1.11336e-05	9.06045e-06	4.24157e-07	6.556e-07	6.35317e-06	1.55924e-06	7.70781e-08	1.35717e-07	1.67461e-07	2.58816e-06	1.96727e-07	0	3.84054e-07	1.30548e-05	4.92711e-07	1.64844e-06	2.1938e-07	8.8722e-07	4.28161e-06	4.76791e-07	0.000384759	6.21244e-07	1.30803e-06	1.24025e-06	8.26021e-07	5.37655e-07	2.36874e-06	5.21561e-06	2.43878e-06
			山东	0.00523491	1.56379e-06	2.29331e-06	2.47743e-06	2.50919e-05	5.72778e-06	2.23718e-06	1.90356e-06	5.95687e-07	1.29653e-06	1.83427e-06	2.7858e-06	2.49147e-06	2.37242e-06	0	2.44433e-06	1.07578e-05	3.09303e-06	3.16058e-06	1.65571e-06	2.60619e-06	1.21974e-05	2.37479e-06	1.46608e-06	1.83395e-06	1.81148e-06	4.43397e-06	1.38389e-06	2.04143e-06	2.561e-06	2.81585e-06
			河南	0.00074089	9.7424e-08	3.79199e-06	1.86871e-05	2.76656e-07	4.35596e-07	2.6968e-06	8.78984e-07	4.89295e-08	8.65446e-08	1.07051e-07	2.03715e-06	1.26045e-07	8.23831e-06	2.49705e-07	0	3.23124e-07	1.1906e-06	1.40808e-07	5.24256e-07	4.02058e-06	3.12287e-07	8.52765e-06	3.74231e-07	7.50268e-07	7.14764e-07	5.56475e-07	3.2587e-07	1.26524e-06	5.48117e-06	1.89255e-06
			湖北	0.00270865	7.98859e-07	1.70538e-06	1.88326e-06	1.10185e-05	7.16762e-06	1.65268e-06	1.35323e-06	3.30253e-07	6.77015e-07	9.16903e-07	2.19959e-06	1.18365e-06	1.78085e-06	6.29446e-06	1.8507e-06	0	2.54006e-06	1.42934e-06	1.14499e-06	2.01243e-06	5.33326e-05	1.78313e-06	9.93165e-07	1.29358e-06	1.27452e-06	4.41337e-06	9.29264e-07	1.47421e-06	1.96663e-06	2.23173e-06
			湖南	0.00220311	2.39308e-07	2.04358e-06	2.86794e-06	8.12833e-07	1.54923e-06	1.86281e-06	1.14046e-06	1.15083e-07	2.10489e-07	2.6529e-07	6.46173e-06	3.17935e-07	2.34615e-06	7.12636e-07	2.68522e-06	1.00021e-06	0	3.60167e-07	8.20912e-07	3.81491e-06	9.54742e-07	2.35625e-06	6.42174e-07	1.03801e-06	1.00731e-06	2.35642e-06	5.7702e-07	1.38342e-06	3.43034e-06	7.23965e-06
			广东	0.0115363	3.63817e-06	1.56209e-06	1.6324e-06	3.29934e-06	2.39395e-06	1.53971e-06	1.3964e-06	8.62781e-07	2.58391e-06	5.13768e-06	1.7404e-06	1.38328e-05	1.59287e-06	3.71493e-06	1.6201e-06	2.87134e-06	1.8374e-06	0	1.27709e-06	1.6789e-06	2.95042e-06	1.59378e-06	1.17718e-06	1.36409e-06	1.35347e-06	2.16891e-06	1.13128e-06	1.45786e-06	1.66282e-06	1.75033e-06
			广西	0.00282902	4.16138e-07	3.08148e-06	2.58299e-06	9.17263e-07	1.20509e-06	3.29624e-06	6.57998e-06	2.2668e-07	3.76252e-07	4.50285e-07	2.11195e-06	5.14695e-07	2.83592e-06	8.56736e-07	2.65545e-06	1.01258e-06	1.84364e-06	5.62214e-07	0	2.34914e-06	9.91298e-07	2.8294e-06	6.62392e-06	8.81503e-06	9.96298e-06	1.36731e-06	4.36185e-06	4.53423e-06	2.42364e-06	2.07943e-06
			海南	0.000968239	2.25601e-07	4.40945e-06	1.15751e-05	6.71311e-07	1.10384e-06	3.6472e-06	1.6298e-06	1.11921e-07	1.99854e-07	2.48503e-07	9.33075e-06	2.94023e-07	6.10517e-06	6.01585e-07	9.08471e-06	7.93921e-07	3.82201e-06	3.29709e-07	1.04794e-06	0	7.65053e-07	6.17388e-06	7.7359e-07	1.42867e-06	1.37127e-06	1.45937e-06	6.81115e-07	2.17456e-06	3.40923e-05	8.07947e-06
			重庆	0.00268713	8.73661e-07	1.7802e-06	1.95956e-06	1.49605e-05	6.80658e-06	1.72684e-06	1.4217e-06	3.57984e-07	7.38695e-07	1.00502e-06	2.27566e-06	1.30403e-06	1.85644e-06	7.6881e-06	1.92681e-06	5.74528e-05	2.6119e-06	1.58217e-06	1.20752e-06	2.08907e-06	0	1.85874e-06	1.05033e-06	1.36052e-06	1.34094e-06	4.39096e-06	9.8391e-07	1.54538e-06	2.04322e-06	2.30758e-06
			四川	0.000165213	1.55362e-07	1.10136e-05	9.44449e-06	4.32201e-07	6.68435e-07	6.36148e-06	1.58065e-06	7.84689e-08	1.38187e-07	1.70523e-07	2.65218e-06	2.00339e-07	0.000391623	3.91296e-07	1.37544e-05	5.02145e-07	1.68507e-06	2.23422e-07	9.00971e-07	4.40704e-06	4.85899e-07	0	6.31308e-07	1.32686e-06	1.25832e-06	8.42566e-07	5.46484e-07	2.39625e-06	5.38161e-06	2.49812e-06
			贵州	0.00348355	5.74236e-07	3.08443e-06	2.72545e-06	1.18163e-06	1.49534e-06	3.22797e-06	4.84118e-06	3.21451e-07	5.22155e-07	6.18356e-07	2.34858e-06	7.0043e-07	2.91232e-06	1.11259e-06	2.78003e-06	1.28814e-06	2.11518e-06	7.60037e-07	9.71468e-06	2.5433e-06	1.26459e-06	2.90763e-06	0	5.5467e-06	5.83516e-06	1.6622e-06	1.87325e-05	3.94766e-06	2.60235e-06	2.32106e-06
			云南	0.00127546	6.01217e-07	6.52155e-06	5.0293e-06	1.4093e-06	1.92155e-06	7.24754e-06	3.57234e-05	3.20272e-07	5.41022e-07	6.53206e-07	3.82317e-06	7.52436e-07	5.75537e-06	1.3063e-06	5.23122e-06	1.57476e-06	3.20902e-06	8.26636e-07	1.21343e-05	4.40856e-06	1.53747e-06	5.73587e-06	5.2061e-06	0	0.000105313	2.22771e-06	4.01674e-06	1.28527e-05	4.60138e-06	3.74614e-06
			西藏	0.00133311	4.55645e-07	4.68085e-06	3.6586e-06	1.05998e-06	1.43836e-06	5.16838e-06	2.03316e-05	2.43371e-07	4.10258e-07	4.94803e-07	2.81193e-06	5.69437e-07	4.15942e-06	9.83459e-07	3.79854e-06	1.18259e-06	2.37358e-06	6.25153e-07	1.04532e-05	3.22518e-06	1.15499e-06	4.14605e-06	4.17444e-06	8.02695e-05	0	1.66278e-06	3.18295e-06	8.73077e-06	3.36034e-06	2.75722e-06
			陕西	0.00362635	5.80222e-07	2.38408e-06	2.81785e-06	2.70303e-06	9.85189e-06	2.2663e-06	1.67409e-06	2.63563e-07	5.03495e-07	6.51211e-07	3.76143e-06	8.00595e-07	2.56096e-06	2.22538e-06	2.73394e-06	3.78571e-06	5.13312e-06	9.26124e-07	1.32622e-06	3.17313e-06	3.49638e-06	2.56647e-06	1.0993e-06	1.5697e-06	1.53718e-06	0	1.00971e-06	1.89881e-06	3.04287e-06	3.87263e-06
			甘肃	0.00395646	6.4672e-07	3.07408e-06	2.76175e-06	1.2902e-06	1.6074e-06	3.19611e-06	4.46538e-06	3.66829e-07	5.89655e-07	6.94821e-07	2.42241e-06	7.83721e-07	2.92563e-06	1.21904e-06	2.80991e-06	1.39901e-06	2.20609e-06	8.47815e-07	7.42546e-06	2.59924e-06	1.37505e-06	2.92155e-06	2.17437e-05	4.96747e-06	5.16444e-06	1.77215e-06	0	3.78467e-06	2.65223e-06	2.39715e-06
			青海	0.00188318	2.20033e-07	4.61864e-06	2.88243e-06	5.52199e-07	7.88192e-07	5.79761e-06	7.00356e-06	1.14586e-07	1.97035e-07	2.40079e-07	1.89848e-06	2.78818e-07	3.636e-06	5.07273e-07	3.07759e-06	6.2608e-07	1.49202e-06	3.08203e-07	2.17744e-06	2.34092e-06	6.09239e-07	3.61375e-06	1.29262e-06	4.48379e-06	3.9961e-06	9.40104e-07	1.06762e-06	0	2.50041e-06	1.84448e-06
			宁夏	0.000890982	1.44333e-07	3.26154e-06	1.12864e-05	4.23978e-07	6.88584e-07	2.63019e-06	1.10229e-06	7.18415e-08	1.27956e-07	1.58879e-07	4.71781e-06	1.87733e-07	4.78943e-06	3.80705e-07	7.97596e-06	4.99652e-07	2.21326e-06	2.103e-07	6.96279e-07	2.19555e-05	4.81882e-07	4.85524e-06	5.09761e-07	9.60311e-07	9.20109e-07	9.01261e-07	4.47582e-07	1.49583e-06	0	4.20635e-06
			新疆	0.000926993	2.32159e-07	2.85356e-06	4.7598e-06	7.32387e-07	1.27894e-06	2.51369e-06	1.35667e-06	1.13531e-07	2.04991e-07	2.56474e-07	6.02681e-05	3.05229e-07	3.47862e-06	6.50198e-07	4.27775e-06	8.80728e-07	7.25553e-06	3.43851e-07	9.27932e-07	8.08215e-06	8.45354e-07	3.50081e-06	7.06228e-07	1.21441e-06	1.17269e-06	1.78168e-06	6.28369e-07	1.71397e-06	6.53373e-06	0
	1/距离行标准化
			1/距离(千米)行标准化	北京	天津	河北	山西	内蒙古	辽宁	吉林	黑龙江	上海	江苏	浙江	安徽	福建	江西	山东	河南	湖北	湖南	广东	广西	海南	重庆	四川	贵州	云南	西藏	陕西	甘肃	青海	宁夏	新疆
			北京	0	0.240156	0.0963509	0.0566452	0.054346	0.0365805	0.026605	0.0218312	0.0221425	0.0268062	0.0209207	0.0256974	0.0151043	0.0185642	0.0646393	0.0371998	0.0221567	0.0175315	0.0124269	0.0112698	0.0102564	0.0162559	0.0153209	0.0133394	0.0111551	0.00902559	0.0254141	0.0194746	0.0172075	0.0260938	0.00948277
			天津	0.240293	0	0.0856151	0.0513287	0.0448345	0.0392459	0.0274393	0.0221306	0.0241576	0.0293145	0.0225615	0.0276502	0.0158491	0.0193822	0.0791006	0.0380743	0.0230386	0.0179852	0.012726	0.0113884	0.0104134	0.0161532	0.0150758	0.0133634	0.0111036	0.00884126	0.0246918	0.0185414	0.0164117	0.0241486	0.00914079
			河北	0.0967422	0.0859137	0	0.127726	0.0625821	0.0270382	0.0209989	0.0178746	0.0232165	0.0302083	0.022604	0.030102	0.0164388	0.0215063	0.0773022	0.0572783	0.0271294	0.0208049	0.0138986	0.0126884	0.011342	0.0196248	0.0182699	0.0154978	0.0126652	0.00988372	0.0345721	0.0235601	0.0201382	0.0324932	0.00989974
			山西	0.0603023	0.0546113	0.135422	0	0.0729248	0.0237468	0.019273	0.0168223	0.0225754	0.0295768	0.022525	0.0305679	0.0171427	0.0231548	0.0565625	0.0689665	0.0300204	0.0234165	0.0152412	0.0142571	0.0125239	0.0237392	0.0222795	0.0180042	0.0146343	0.0113581	0.0485707	0.0305687	0.0252394	0.0448298	0.0111433
			内蒙古	0.0732518	0.060397	0.0840118	0.0923328	0	0.031085	0.0261777	0.023303	0.0227332	0.0274526	0.022338	0.0276779	0.0176719	0.0222617	0.0466984	0.0448904	0.0269263	0.0225328	0.0159992	0.0153457	0.0136367	0.0240999	0.023832	0.0189732	0.0162724	0.0140276	0.0416904	0.0366461	0.0317977	0.0604699	0.0154667
			辽宁	0.0612271	0.0656509	0.0450725	0.0373361	0.0386006	0	0.138344	0.0761202	0.0331679	0.034027	0.0299	0.0312894	0.021968	0.0239114	0.0493653	0.0331809	0.02604	0.0217588	0.0171288	0.0152033	0.014366	0.0192682	0.0182348	0.0169099	0.0145578	0.0121211	0.0253613	0.0213069	0.0196751	0.0257386	0.0131684
			吉林	0.0468021	0.0482422	0.0367906	0.0318479	0.0341651	0.145401	0	0.175697	0.0285343	0.0287803	0.0260825	0.0268428	0.0200772	0.0214427	0.038392	0.0283192	0.023035	0.0197627	0.0160287	0.0144001	0.0136799	0.0178906	0.0171188	0.0158806	0.0139079	0.0119366	0.0228889	0.020035	0.018747	0.0238683	0.0134034
			黑龙江	0.0449778	0.0455686	0.0366773	0.0325564	0.0356191	0.0936972	0.20577	0	0.0287835	0.0289694	0.0266089	0.0272952	0.0211122	0.0223974	0.0372572	0.0289106	0.023923	0.0208629	0.0172114	0.0156293	0.0148779	0.0192302	0.0185536	0.0171742	0.0152268	0.0133863	0.0242013	0.0217845	0.0205725	0.0257158	0.0154489
			上海	0.027174	0.0296301	0.0283767	0.026025	0.0206984	0.0243193	0.0199063	0.0171455	0	0.0989832	0.179481	0.0718627	0.0469617	0.0447426	0.0400364	0.0343104	0.0412318	0.0312485	0.0234733	0.017506	0.0170283	0.0198547	0.0171571	0.0183323	0.0143703	0.00976425	0.0228719	0.016333	0.0147489	0.0177752	0.00865121
			江苏	0.027209	0.029738	0.0305381	0.0282005	0.0206733	0.0206351	0.0166062	0.0142723	0.0818676	0	0.0899606	0.173945	0.0349868	0.0476458	0.0464044	0.0431193	0.0521286	0.0328287	0.0208035	0.0159411	0.0149143	0.0200011	0.0169247	0.0176251	0.0133948	0.00891306	0.0245969	0.0161758	0.0143327	0.0177988	0.00781853
			浙江	0.0239108	0.0257715	0.0257302	0.0241833	0.0189415	0.0204172	0.016946	0.0147613	0.167152	0.101297	0	0.0828381	0.0565454	0.05457	0.0350649	0.0333304	0.0462195	0.0344928	0.0251456	0.0180326	0.0175196	0.0201348	0.017092	0.0187589	0.0143902	0.00943304	0.0224671	0.015725	0.0141601	0.0168383	0.00813139
			安徽	0.0255354	0.0274602	0.0297912	0.0285331	0.0204049	0.0185762	0.0151628	0.0131649	0.0581876	0.17029	0.0720217	0	0.0358414	0.0602029	0.0421862	0.0477074	0.072863	0.0393902	0.0224694	0.0170755	0.0157307	0.0220249	0.0182131	0.0192	0.0142064	0.00914676	0.026773	0.0168727	0.0148463	0.0182902	0.00783195
			福建	0.0237916	0.0249505	0.025789	0.0253649	0.0206518	0.0206738	0.0179774	0.0161412	0.0602756	0.054294	0.0779294	0.056814	0	0.0817752	0.0310462	0.0333968	0.0529844	0.0524822	0.0522891	0.0307085	0.0319308	0.0278597	0.0232907	0.0285168	0.0215563	0.0130482	0.026671	0.0195526	0.0178622	0.0198808	0.0104955
			江西	0.0214642	0.0223972	0.0247652	0.0251483	0.0190961	0.0165177	0.0140934	0.0125694	0.0421534	0.0542732	0.0552042	0.0700489	0.0600255	0	0.0296112	0.0378511	0.104603	0.0913911	0.0417098	0.026937	0.0247217	0.0300755	0.0234475	0.028664	0.0196555	0.0112038	0.028891	0.0188466	0.0167727	0.0190303	0.00883205
			山东	0.0720465	0.0881146	0.085812	0.0592208	0.038616	0.0328733	0.0243251	0.0201561	0.0363618	0.0509564	0.0341955	0.0473188	0.0219685	0.0285453	0	0.0656951	0.0355717	0.0254474	0.0168235	0.0145513	0.013255	0.0208235	0.0186966	0.0171195	0.0136872	0.0101504	0.0319491	0.0212323	0.0185105	0.0262103	0.00976596
			河南	0.0410568	0.0419979	0.0629613	0.071501	0.0367576	0.0218795	0.0177674	0.0154874	0.0308563	0.0468855	0.0321859	0.0529879	0.0234005	0.0361314	0.065052	0	0.0549742	0.0358678	0.0200971	0.0178434	0.0155454	0.03017	0.025769	0.0226632	0.0170911	0.0117058	0.057195	0.027809	0.0231179	0.0328613	0.010381
			湖北	0.0240413	0.0249839	0.0293179	0.0305983	0.0216759	0.016881	0.0142082	0.0125994	0.0364551	0.0557252	0.0438791	0.0795621	0.0364986	0.0981652	0.0346291	0.0540465	0	0.08578	0.0306898	0.0236352	0.0205676	0.0338078	0.0257408	0.028454	0.0192691	0.0112495	0.0369744	0.0212756	0.0184665	0.0218113	0.00901153
			湖南	0.0212878	0.0218262	0.0251603	0.0267092	0.0202991	0.0157853	0.0136413	0.012296	0.0309182	0.0392724	0.0366453	0.0481333	0.0404575	0.0959791	0.0277228	0.0394613	0.0959941	0	0.0496944	0.0364733	0.0300032	0.0457732	0.0322764	0.0436656	0.0262198	0.013347	0.0361689	0.0228152	0.0201433	0.0219222	0.00990838
			广东	0.0203428	0.0208206	0.0226599	0.0234367	0.0194311	0.0167525	0.0149158	0.0136755	0.0313111	0.0335512	0.0360157	0.0370159	0.0543421	0.059054	0.0247086	0.0298084	0.046301	0.0669955	0	0.0737112	0.0826836	0.0385915	0.0310449	0.049006	0.0339972	0.0163771	0.0287797	0.0220159	0.0203341	0.0207902	0.0115302
			广西	0.0187872	0.0189742	0.0210664	0.0223257	0.0189794	0.0151422	0.0136461	0.0126464	0.0237797	0.0261811	0.0263017	0.0286461	0.0324999	0.0388381	0.0217637	0.0269514	0.0363122	0.0500738	0.0750638	0	0.111746	0.0475743	0.0395046	0.0824218	0.0588831	0.0205257	0.0295442	0.0244077	0.0229312	0.0217501	0.0127325
			海南	0.019605	0.0198938	0.0215924	0.0224875	0.0193388	0.0164064	0.0148646	0.0138036	0.0265226	0.0280866	0.0293006	0.0302599	0.0387488	0.0408708	0.0227319	0.0269234	0.0362329	0.0472313	0.0965478	0.128132	0	0.0391164	0.0336447	0.0548752	0.0452131	0.0201229	0.0278537	0.0232211	0.0219445	0.02132	0.0131081
			重庆	0.0212072	0.0210611	0.0254986	0.0290915	0.0233258	0.0150182	0.0132677	0.0121768	0.0211061	0.0257067	0.0229826	0.0289155	0.023074	0.0339348	0.024373	0.0356617	0.0406477	0.0491781	0.0307549	0.0372304	0.0266967	0	0.116968	0.0834088	0.046311	0.0201338	0.055257	0.0389983	0.0337807	0.0311304	0.0131031
			四川	0.0218208	0.0214595	0.0259157	0.0298072	0.0251823	0.0155164	0.0138598	0.012826	0.0199115	0.0237482	0.021299	0.0261046	0.0210593	0.0288831	0.0238909	0.0332537	0.0337874	0.0378582	0.0270102	0.0337511	0.0250686	0.127697	0	0.0647499	0.0532042	0.0262288	0.0549433	0.0521782	0.0464887	0.0366169	0.0158794
			贵州	0.0193885	0.0194123	0.0224345	0.0245816	0.0204596	0.0146844	0.0131211	0.0121161	0.0217118	0.0252384	0.0238558	0.0280837	0.0263138	0.0360336	0.0223245	0.0298459	0.0381151	0.052268	0.0435118	0.0718627	0.0417264	0.0929283	0.0660785	0	0.078555	0.0217168	0.0374837	0.0301157	0.0276977	0.0252683	0.0130664
			云南	0.0206187	0.0205117	0.0233152	0.0254091	0.0223146	0.0160765	0.0146133	0.0136608	0.0216435	0.024392	0.023272	0.0264253	0.0252952	0.0314221	0.0226978	0.0286229	0.0328244	0.0399122	0.0383867	0.0652878	0.04372	0.0656146	0.0690473	0.0998973	0	0.0349333	0.0362276	0.0347014	0.0336976	0.0281603	0.017299
			西藏	0.0265648	0.0260075	0.0289729	0.0314027	0.0306313	0.0213148	0.0199715	0.0191237	0.0234177	0.0258453	0.024292	0.0270923	0.0243814	0.0285207	0.0268039	0.031217	0.0305151	0.0323524	0.0294457	0.0362396	0.030985	0.0454242	0.0542031	0.0439765	0.0556269	0	0.0391812	0.0493893	0.0547221	0.0398826	0.0424969
			陕西	0.0316884	0.0307702	0.0429331	0.0568893	0.0385666	0.0188931	0.0162236	0.0146469	0.0232382	0.0302155	0.0245106	0.0335946	0.0211126	0.0311566	0.0357411	0.064616	0.0424889	0.0371408	0.0219212	0.022098	0.0181692	0.0528132	0.0481011	0.0321559	0.0244387	0.0165986	0	0.0569037	0.0417243	0.0569587	0.0136914
			甘肃	0.0263941	0.0251149	0.0318019	0.0389174	0.036848	0.0172529	0.0154356	0.0143306	0.0180375	0.0215986	0.0186469	0.0230127	0.0168236	0.0220918	0.0258177	0.034149	0.0265746	0.0254655	0.0182274	0.0198434	0.0164644	0.0405146	0.0496524	0.0280816	0.0254446	0.0227425	0.0618517	0	0.167923	0.0914651	0.0194758
			青海	0.0261116	0.0248897	0.0304352	0.035977	0.0357982	0.0178377	0.0161713	0.0151524	0.0182368	0.0214273	0.0188002	0.0226715	0.0172078	0.022013	0.0252009	0.0317849	0.0258254	0.025173	0.0188492	0.0208735	0.0174209	0.0392929	0.049531	0.0289169	0.0276648	0.0282128	0.0507784	0.188013	0	0.0753632	0.0243691
			宁夏	0.0369662	0.034191	0.0458457	0.0596572	0.0635558	0.021785	0.0192214	0.0176826	0.0205189	0.0248416	0.0208711	0.0260754	0.0178803	0.0233171	0.0333136	0.04218	0.028477	0.0255764	0.0179918	0.0184834	0.0158009	0.0338049	0.0364218	0.0246283	0.0215832	0.0191963	0.0647143	0.095606	0.0703576	0	0.019455
			新疆	0.0335257	0.03231	0.034871	0.0370208	0.0405833	0.0278254	0.0269472	0.0265203	0.0249317	0.0272427	0.025162	0.0278752	0.0235657	0.0270163	0.0309884	0.0332658	0.0293729	0.0288598	0.0249109	0.0270127	0.0242531	0.0355226	0.0394319	0.0317944	0.0331006	0.0510654	0.0388349	0.0508229	0.0567969	0.0485697	0
[truncated: 16 more columns]
